# Supplementary material
Source: publisher figshare collection journal article supplement (https://sage.figshare.com/ndownloader/files/35069089)

# Appendices

Appendix 1: Search histories

**PubMed**

Search date (original): 21/09/2018

Update: 14/10/2020

| **ID** | **Search** |
| --- | --- |
| **Block 1 (Intervention**  **telemedicine)** | |
| #1 | Telecommunication [Mesh] |
| #2 | Telenursing [Mesh] |
| #3 | **"Computer Communication Networks"[Mesh]** |
| #4 | **(Telemedicin*[Title/Abstract] OR tele medicin*[Title/Abstract] OR telenurs*[Title/Abstract] OR tele nurs*[Title/Abstract] OR teleassist*[Title/Abstract] OR tele assist*[Title/Abstract] OR telebase*[Title/Abstract] OR tele base*[Title/Abstract] OR teleconsult*[Title/Abstract] OR tele consult*[Title/Abstract] OR telecouns*[Title/Abstract] OR tele couns*[Title/Abstract] OR telederm*[Title/Abstract] OR tele derm*[Title/Abstract] OR telediagnos*[Title/Abstract] OR tele diagnos*[Title/Abstract] OR telefollow*[Title/Abstract] OR tele follow*[Title/Abstract] OR teleguid*[Title/Abstract] OR tele guid*[Title/Abstract] OR telehealth*[Title/Abstract] OR tele health*[Title/Abstract] OR telehome*[Title/Abstract] OR tele home*[Title/Abstract] OR teleintervention*[Title/Abstract] OR tele intervention*[Title/Abstract] OR telemanag*[Title/Abstract] OR tele manag*[Title/Abstract] OR telemed*[Title/Abstract] OR tele med*[Title/Abstract] OR telemonitor*[Title/Abstract] OR tele monitor*[Title/Abstract] OR teleophthalmo*[Title/Abstract] OR tele ophthalmo*[Title/Abstract] OR telepatholog*[Title/Abstract] OR tele patholog*[Title/Abstract] OR teleprocedu*[Title/Abstract] OR tele procedu*[Title/Abstract] OR telerefer*[Title/Abstract] OR tele refer*[Title/Abstract] OR telerehab*[Title/Abstract] OR tele rehab*[Title/Abstract] OR teletherap*[Title/Abstract] OR tele therap*[Title/Abstract] OR teletreat*[Title/Abstract] OR tele treat*[Title/Abstract] OR telecare[Title/Abstract] OR tele care[Title/Abstract] OR telematic*[Title/Abstract] OR tele matic*[Title/Abstract] OR telecommunica*[Title/Abstract] OR tele communica*[Title/Abstract] OR telehomecare[Title/Abstract] OR tele home care[Title/Abstract] OR telehome care[Title/Abstract] OR tele homecare[Title/Abstract] OR mobile health[Title/Abstract] OR selfmonitor*[Title/Abstract] OR self monitor*[Title/Abstract] OR ehealth[Title/Abstract] OR digital health[Title/Abstract] OR dhealth[Title/Abstract] OR home monitor*[Title/Abstract] OR electronic care[Title/Abstract] OR ecare[Title/Abstract] OR econsult*[Title/Abstract] OR electronic consult*[Title/Abstract] OR ediagnos*[Title/Abstract] OR electronic diag*[Title/Abstract] OR electronic health[Title/Abstract] OR emedicine[Title/Abstract] OR electronic medicine[Title/Abstract] OR enurs*[Title/Abstract] OR electronic nurs*[Title/Abstract] OR ephysic*[Title/Abstract] OR electronic physic*[Title/Abstract] OR etherap*[Title/Abstract] OR electronic therap*[Title/Abstract] OR electronic mail*[Title/Abstract] OR mhealth[Title/Abstract] OR iphone*[Title/Abstract] OR smartphone*[Title/Abstract] OR PDA[Title/Abstract] OR Personal Digital Assistant*[Title/Abstract] OR phone*[Title/Abstract] OR tablet*[Title/Abstract] OR internet[Title/Abstract] OR compute*[Title/Abstract] OR app[Title/Abstract] OR application*[Title/Abstract] OR digital*[Title/Abstract] OR mobile*[Title/Abstract] OR cellphone*[Title/Abstract] OR telephone*[Title/Abstract] OR remote*[Title/Abstract] OR web base*[Title/Abstract] OR webbase*[Title/Abstract] OR cellular[Title/Abstract] OR landline[Title/Abstract] OR land line[Title/Abstract] OR blackberr*[Title/Abstract] OR black berr*[Title/Abstract] OR palmpilo*[Title/Abstract] OR palm pilot*[Title/Abstract] OR android[Title/Abstract] OR pocket PC*[Title/Abstract] OR radio*[Title/Abstract] OR walkee talkee*[Title/Abstract])** |
| #5 | #1 OR #2 OR #3 Or #4 |
| **Block 2**  **(Patient- diabetics)** | |
| #6 | “Diabetes Mellitus”[Mesh] |
| #7 | **(diabet*[Title/Abstract] OR DM[Title/Abstract] OR IDDM[Title/Abstract] OR NIDDM[Title/Abstract] OR MODY[Title/Abstract])** |
| #8 | #6 OR #7 |
| **Block 3**  **(Publication type - RCT)** | |
| #9 | **"Controlled Clinical Trials as Topic"[Mesh]** |
| #10 | **"Controlled Clinical Trial" [Publication Type]** |
| #11 | **((((trial*[Title/Abstract] OR study[Title/Abstract] OR studies[Title/Abstract]))) AND random*[Title/Abstract]) AND control*[title/Abstract]** |
| #12 | #9 OR #10 OR #11 |
| **Limitations** | |
| **Block 3**  **(combined block searches)** | |
| #9 | #5 AND #8 AND #12 |
| #10 | #9  Filters: **Danish; English; Norwegian; Swedish** |

**Embase**

Search date (original): 25/9/2018

Updated: 14/10/2020

| **ID** | **Search** |
| --- | --- |
| **Block 1 (Intervention**  **telemedicine)** | |
| #1 | 'telecommunication'/exp |
| #2 | **telemedicin*:ab,kw,ti OR 'tele medicin*':ab,kw,ti OR telenurs*:ab,kw,ti OR 'tele nurs*':ab,kw,ti OR teleassist*:ab,kw,ti OR 'tele assist*':ab,kw,ti OR telebase*:ab,kw,ti OR 'tele base*':ab,kw,ti OR teleconsult*:ab,kw,ti OR 'tele consult*':ab,kw,ti OR telecouns*:ab,kw,ti OR 'tele couns*':ab,kw,ti OR telederm*:ab,kw,ti OR 'tele derm*':ab,kw,ti OR telediagnos*:ab,kw,ti OR 'tele diagnos*':ab,kw,ti OR telefollow*:ab,kw,ti OR 'tele follow*':ab,kw,ti OR teleguid*:ab,kw,ti OR 'tele guid*':ab,kw,ti OR telehealth*:ab,kw,ti OR 'tele health*':ab,kw,ti OR telehome*:ab,kw,ti OR 'tele home*':ab,kw,ti OR teleintervention*:ab,kw,ti OR 'tele intervention*':ab,kw,ti OR telemanag*:ab,kw,ti OR 'tele manag*':ab,kw,ti OR telemed*:ab,kw,ti OR 'tele med*':ab,kw,ti OR telemonitor*:ab,kw,ti OR 'tele monitor*':ab,kw,ti OR teleophthalmo*:ab,kw,ti OR 'tele ophthalmo*':ab,kw,ti OR telepatholog*:ab,kw,ti OR 'tele patholog*':ab,kw,ti OR teleprocedu*:ab,kw,ti OR 'tele procedu*':ab,kw,ti OR telerefer*:ab,kw,ti OR 'tele refer*':ab,kw,ti OR telerehab*:ab,kw,ti OR 'tele rehab*':ab,kw,ti OR teletherap*:ab,kw,ti OR 'tele therap*':ab,kw,ti OR teletreat*:ab,kw,ti OR 'tele treat*':ab,kw,ti OR telecare:ab,kw,ti OR 'tele care':ab,kw,ti OR telematic*:ab,kw,ti OR 'tele matic*':ab,kw,ti OR telecommunica*:ab,kw,ti OR 'tele communica*':ab,kw,ti OR telehomecare:ab,kw,ti OR 'tele home care':ab,kw,ti OR 'telehome care':ab,kw,ti OR 'tele homecare':ab,kw,ti OR 'mobile health':ab,kw,ti OR selfmonitor*:ab,kw,ti OR 'self monitor*':ab,kw,ti OR ehealth:ab,kw,ti OR 'digital health':ab,kw,ti OR dhealth:ab,kw,ti OR 'home monitor*':ab,kw,ti OR 'electronic care':ab,kw,ti OR ecare:ab,kw,ti OR econsult*:ab,kw,ti OR 'electronic consult*':ab,kw,ti OR ediagnos*:ab,kw,ti OR 'electronic diag*':ab,kw,ti OR 'electronic health':ab,kw,ti OR emedicine:ab,kw,ti OR 'electronic medicine':ab,kw,ti OR enurs*:ab,kw,ti OR 'electronic nurs*':ab,kw,ti OR ephysic*:ab,kw,ti OR 'electronic physic*':ab,kw,ti OR etherap*:ab,kw,ti OR 'electronic therap*':ab,kw,ti OR 'electronic mail*':ab,kw,ti OR mhealth:ab,kw,ti OR iphone*:ab,kw,ti OR smartphone*:ab,kw,ti OR pda:ab,kw,ti OR 'personal digital assistant*':ab,kw,ti OR phone*:ab,kw,ti OR tablet*:ab,kw,ti OR internet:ab,kw,ti OR compute*:ab,kw,ti OR app:ab,kw,ti OR application*:ab,kw,ti OR digital*:ab,kw,ti OR mobile*:ab,kw,ti OR cellphone*:ab,kw,ti OR telephone*:ab,kw,ti OR remote*:ab,kw,ti OR 'web base*':ab,kw,ti OR webbase*:ab,kw,ti OR cellular:ab,kw,ti OR landline:ab,kw,ti OR 'land line':ab,kw,ti OR blackberr*:ab,kw,ti OR 'black berr*':ab,kw,ti OR palmpilo*:ab,kw,ti OR 'palm pilot*':ab,kw,ti OR android:ab,kw,ti OR 'pocket pc*':ab,kw,ti OR radio*:ab,kw,ti OR 'walkee talkee*':ab,kw,ti** |
| #3 | #1 OR #2 |
| **Block 2**  **(Patient- diabetics)** | |
| #4 | 'diabetes mellitus'/exp |
| #5 | diabet*:ab,kw,ti OR dm:ab,kw,ti OR iddm:ab,kw,ti OR niddm:ab,kw,ti OR mody:ab,kw,ti |
| #6 | #4 or #5 |
| **Block 3 (Publication type - RCT)** | |
| #7 | **'controlled clinical trial'**/exp |
| #8 | (**trial***:ab,kw,ti OR **study**:ab,kw,ti OR **studies**:ab,kw,ti) AND **random***:ab,kw,ti AND **control***:ab,kw,ti |
| #9 | #7 OR #8 |
| **Block 4**  **(combined block searches)** | |
| #10 | #3 AND #6 AND #9 |
| #11 | #3 AND #6 AND #9 AND [embase]/lim |
| #12 | #11 AND (**'article'**/it OR **'article in press'**/it OR **'conference paper'**/it) |
| #13 | #12 AND ([danish]/lim OR [english]/lim OR [norwegian]/lim OR [swedish]/lim) |

**CINAHL**

Search day (original): 24/9/2018

Updated: 14/10/2020

| **ID** | **Search** |
| --- | --- |
| **Block 1 (Intervention**  **telemedicine)** | |
| #1 | (MH "Telecommunications+") |
| #2 | **TI(Telemedicin* OR tele medicin* OR telenurs* OR tele nurs* OR teleassist* OR tele assist* OR telebase* OR tele base* OR teleconsult* OR tele consult* OR telecouns* OR tele couns* OR telederm* OR tele derm* OR telediagnos* OR tele diagnos* OR telefollow* OR tele follow* OR teleguid* OR tele guid* OR telehealth* OR tele health* OR telehome* OR tele home* OR teleintervention* OR tele intervention* OR telemanag* OR tele manag* OR telemed* OR tele med* OR telemonitor* OR tele monitor* OR teleophthalmo* OR tele ophthalmo* OR telepatholog* OR tele patholog* OR teleprocedu* OR tele procedu* OR telerefer* OR tele refer* OR telerehab* OR tele rehab* OR teletherap* OR tele therap* OR teletreat* OR tele treat* OR telecare OR tele care OR telematic* OR tele matic* OR telecommunica* OR tele communica* OR telehomecare OR tele home care OR telehome care OR tele homecare OR mobile health OR selfmonitor* OR self monitor* OR ehealth OR digital health OR dhealth OR home monitor* OR electronic care OR ecare OR econsult* OR electronic consult* OR ediagnos* OR electronic diag* OR electronic health OR emedicine OR electronic medicine OR enurs* OR electronic nurs* OR ephysic* OR electronic physic* OR etherap* OR electronic therap* OR electronic mail* OR mhealth OR iphone* OR smartphone* OR PDA OR Personal Digital Assistant* OR phone* OR tablet* OR internet OR compute* OR app OR application* OR digital* OR mobile* OR cellphone* OR telephone* OR remote* OR web base* OR webbase* OR cellular OR landline OR land line OR blackberry* OR black berr* OR palmpilo* OR palm pilot* OR android OR pocket PC* OR radio* OR walkee talkee*) OR AB(Telemedicin* OR tele medicin* OR telenurs* OR tele nurs* OR teleassist* OR tele assist* OR telebase* OR tele base* OR teleconsult* OR tele consult* OR telecouns* OR tele couns* OR telederm* OR tele derm* OR telediagnos* OR tele diagnos* OR telefollow* OR tele follow* OR teleguid* OR tele guid* OR telehealth* OR tele health* OR telehome* OR tele home* OR teleintervention* OR tele intervention* OR telemanag* OR tele manag* OR telemed* OR tele med* OR telemonitor* OR tele monitor* OR teleophthalmo* OR tele ophthalmo* OR telepatholog* OR tele patholog* OR teleprocedu* OR tele procedu* OR telerefer* OR tele refer* OR telerehab* OR tele rehab* OR teletherap* OR tele therap* OR teletreat* OR tele treat* OR telecare OR tele care OR telematic* OR tele matic* OR telecommunica* OR tele communica* OR telehomecare OR tele home care OR telehome care OR tele homecare OR mobile health OR selfmonitor* OR self monitor* OR ehealth OR digital health OR dhealth OR home monitor* OR electronic care OR ecare OR econsult* OR electronic consult* OR ediagnos* OR electronic diag* OR electronic health OR emedicine OR electronic medicine OR enurs* OR electronic nurs* OR ephysic* OR electronic physic* OR etherap* OR electronic therap* OR electronic mail* OR mhealth OR iphone* OR smartphone* OR PDA OR Personal Digital Assistant* OR phone* OR tablet* OR internet OR compute* OR app OR application* OR digital* OR mobile* OR cellphone* OR telephone* OR remote* OR web base* OR webbase* OR cellular OR landline OR land line OR blackberry* OR black berr* OR palmpilo* OR palm pilot* OR android OR pocket PC* OR radio* OR walkee talkee*)** |
| #3 | #1 OR #2 |
| **Block 2**  **(Patient- diabetics)** | |
| #4 | (MH "Diabetes Mellitus+") |
| #5 | TI (diabet* OR dm OR iddm OR niddm OR mody) OR AB (diabet* OR dm OR iddm OR niddm OR mody) |
| #6 | #4 OR #5 |
| **Block 3**  **(Publication type - RCT)** | |
| #9 | MH "Randomized Controlled Trials" |
| #10 | ((TI(trial* OR study OR studies)) OR (AB(trial* OR study OR studies))) AND (TI(random*) OR AB(random*)) AND (TI(control*) OR AB(control*)) |
| #11 | #9 OR #10 |
| **Block 3**  **(combined block searches)** | |
| #12 | #3 AND #6 AND #11 |
| #13 | #12  **Limiters** Language: Danish, English, Norwegian, Swedish |

**Cochrane Library**

Search date (original): 11/09/2018

Updated: 14/10/2020

| **ID** | **Search** |
| --- | --- |
| **Block 1**  **(Intervention -telemedicine)** | |
| #1 | MeSH descriptor: [Telecommunications] |
| #2 | MeSH descriptor: [Telenursing] |
| #3 | **´Computer Communication Networks´[Mesh]** |
| #4 | **(Telemedicin* OR `tele medicin*´ OR telenurs* OR `tele nurs*´ OR teleassist* OR `tele assist*´ OR telebase* OR `tele base*´ OR teleconsult* OR `tele consult*´ OR telecouns* OR `tele couns*´ OR telederm* OR `tele derm*´ OR telediagnos* OR `tele diagnos*´ OR telefollow* OR `tele follow*´ OR teleguid* OR `tele guid*´ OR telehealth* OR `tele health*´ OR telehome* OR `tele home*´ OR teleintervention* OR `tele intervention*´ OR telemanag* OR `tele manag*´ OR telemed* OR `tele med*´ OR telemonitor* OR `tele monitor*´ OR teleophthalmo* OR `tele ophthalmo*´ OR telepatholog* OR `tele patholog*´ OR teleprocedu* OR `tele procedu*´ OR telerefer* OR `tele refer*´ OR telerehab* OR `tele rehab*´ OR teletherap* OR `tele therap*´ OR teletreat* OR `tele treat*´ OR telecare OR `tele care´ OR telematic* OR `tele matic*´ OR telecommunica* OR `tele communica*´ OR telehomecare OR `tele home care´ OR `telehome care´ OR `tele homecare´ OR `mobile health´ OR selfmonitor* OR `self monitor*´ OR ehealth OR `digital health´ OR dhealth OR `home monitor*´ OR `electronic care´ OR ecare OR econsult* OR `electronic consult*´ OR ediagnos* OR `electronic diag*´ OR `electronic health´ OR emedicine OR `electronic medicine´ OR enurs* OR `electronic nurs*´ OR ephysic* OR `electronic physic*´ OR etherap* OR `electronic therap*´ OR `electronic mail*´ OR mhealth OR iphone* OR smartphone* OR PDA OR `Personal Digital Assistant*´ OR phone* OR tablet* OR internet OR compute* OR app OR application* OR digital* OR mobile* OR cellphone* OR telephone* OR remote* OR `web base*´ OR webbase* OR cellular OR landline OR `land line´ OR blackberr* OR `black berr*´ OR palmpilo* OR `palm pilot*´ OR android OR `pocket PC*´ OR radio* OR `walkee talkee*´):ti,ab,kw** |
| #5 | #1 OR #2 OR #3 OR #4 |
| **Block 2**  **(Population: diabetes)** | |
| #6 | MeSH descriptor: [Diabetes Mellitus] explode all trees |
| #7 | **(diabet* OR DM OR IDDM OR NIDDM OR MODY):ti,ab,kw** |
| #8 | #6 OR #7 |
| **Block 3**  **(Publication type - RCT)** | |
| #9 | **MeSH descriptor: [Controlled Clinical Trials as Topic] explode all trees** |
| #10 | **MeSH descriptor: [Controlled Clinical Trial] explode all trees** |
| #11 | (trial* OR study OR studies):ti,ab,kw AND random*:ti,ab,kw AND control*:ti,ab,kw |
| #12 | #9 OR #10 OR #11 |
| **Block 3**  **(combined block searches)** | |
| #13 | #5 AND #8 AND #12 |
| #14 | #13 (NOT from EMBASE and PubMed and Cinahl) |

Appendix 2: Risk of bias assessment across studies

| **Study ID** | **Randomization process** | **Deviations from intended interventions** | **Mising outcome data** | **Measurement of the outcome** | **Selection of the reported result** | **Overall Bias** |
| --- | --- | --- | --- | --- | --- | --- |
| Homko 2007 | Some concerns | High | Low | Low | Some concerns | High |
| Durnwald 2016 | Some concerns | Some concerns | Low | Low | Low | Some concerns |
| Given 2015 | Low | Low | Low | Low | Low | Low |
| Homko 2012 | Some concerns | Low | Low | Low | Some concerns | Some concerns |
| Mackillop | Low | Low | Low | Low | Low | Low |
| Miremberg 2018 | Low | Low | Low | Low | Low | Low |
| Perez-Ferre 2010 | Some concerns | Low | Low | Low | Some concerns | Some concerns |
| Raseka 2018 | Low | Low | Low | Low | Low | Low |
| Carolan-Olah 2019 | Low | Some concerns | High | Low | Low | High |
| Cheung 2019 | Low | Low | High | Low | Low | Some concerns |
| Sung 2019 | Low | Low | Low | Low | Low | Low |

Appendix 3: Forest plots for all subgroups


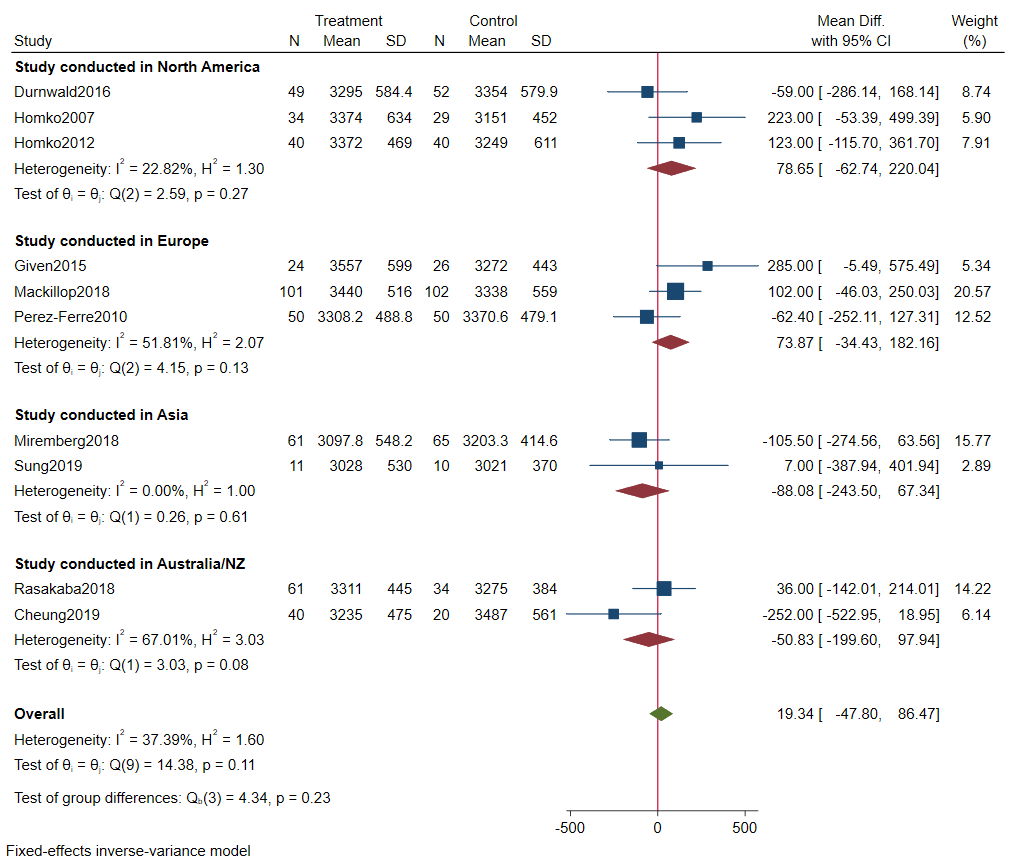


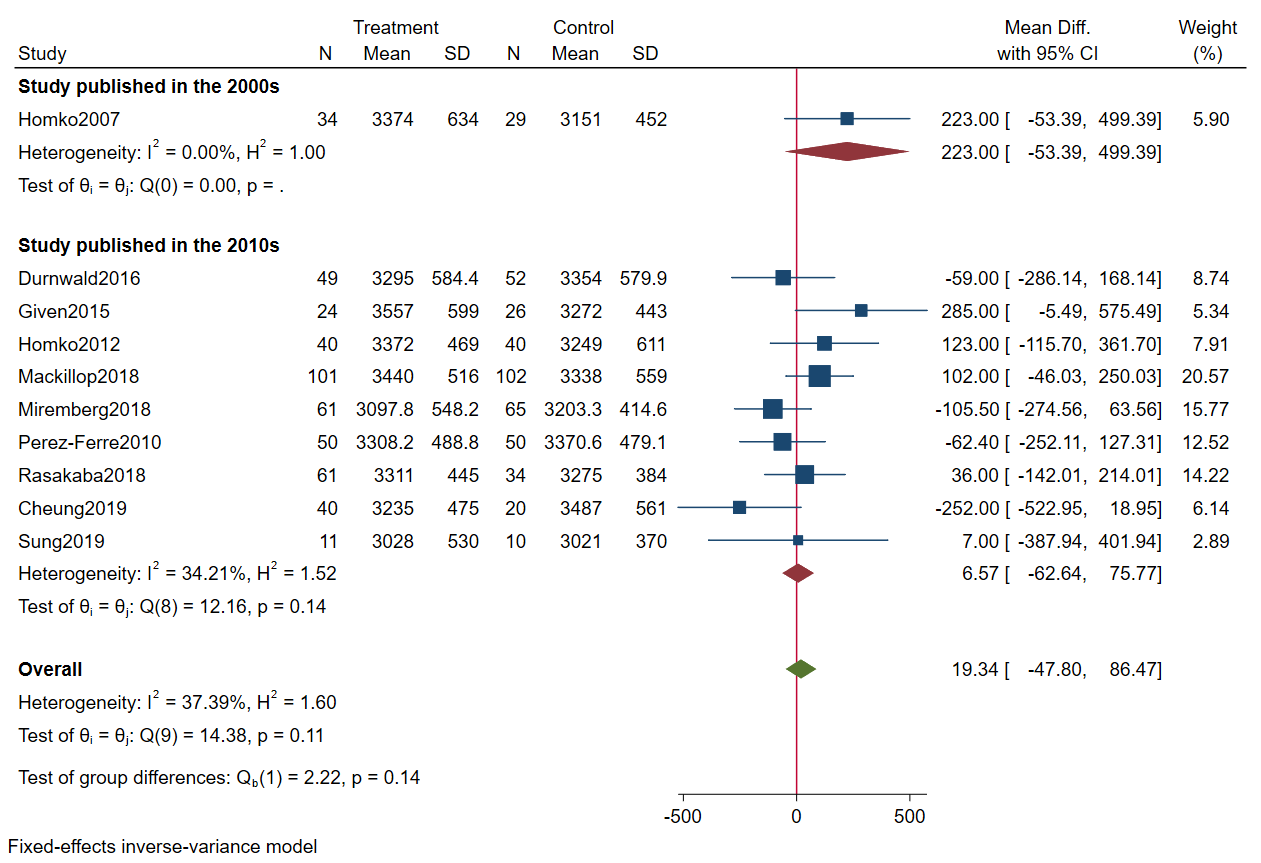


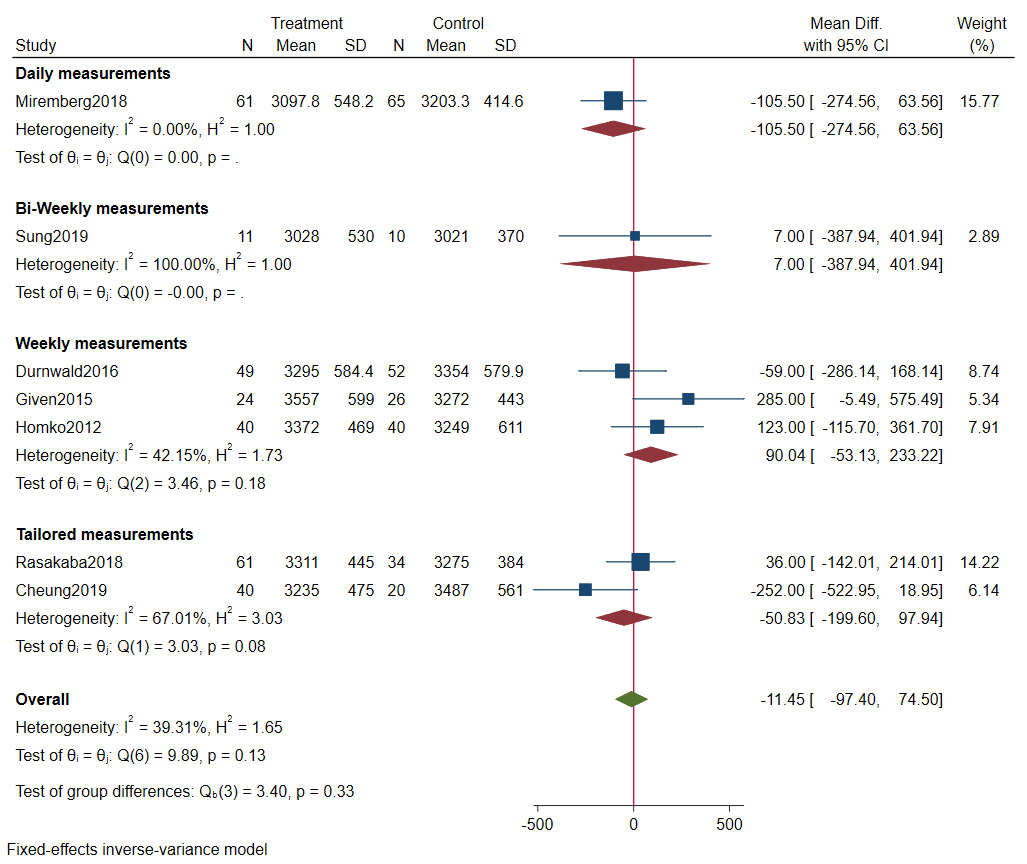


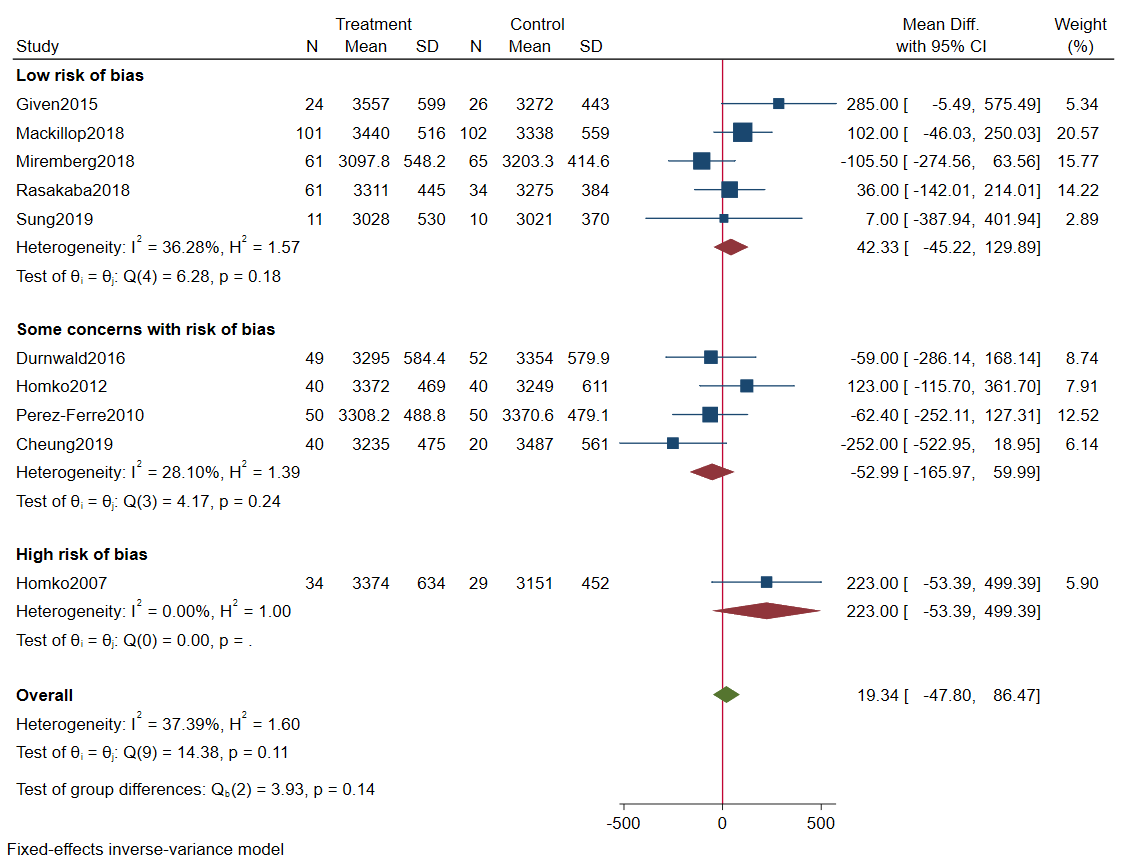


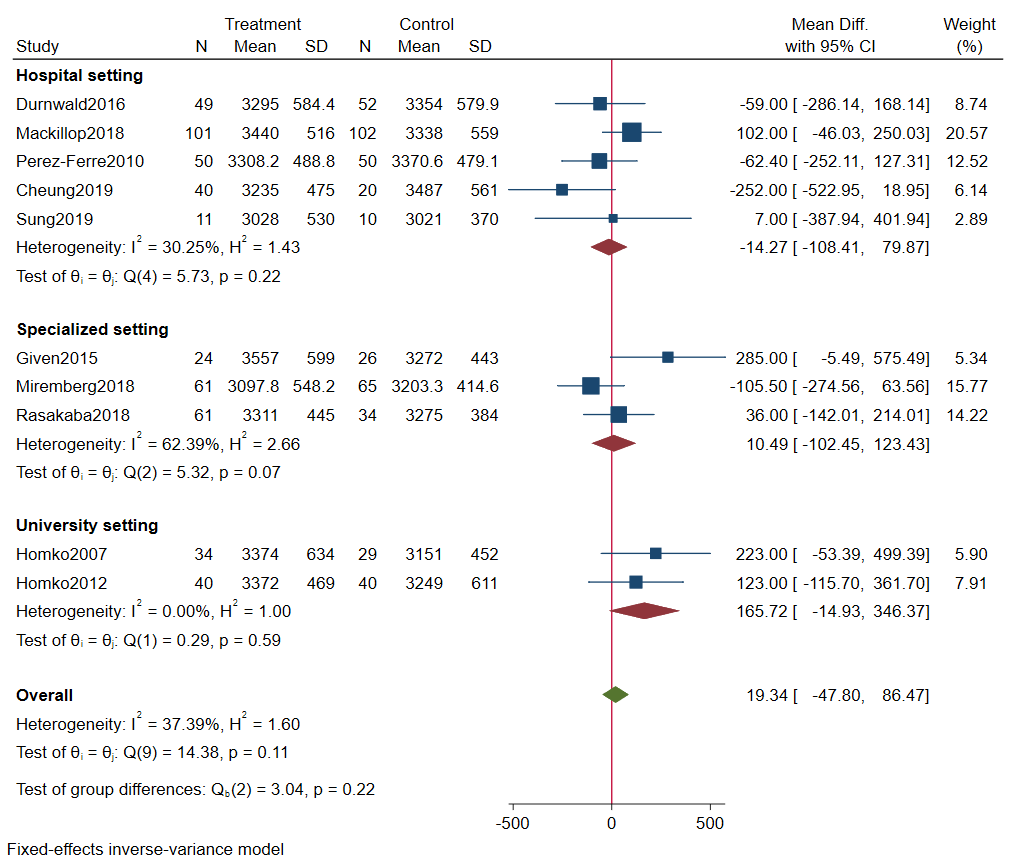


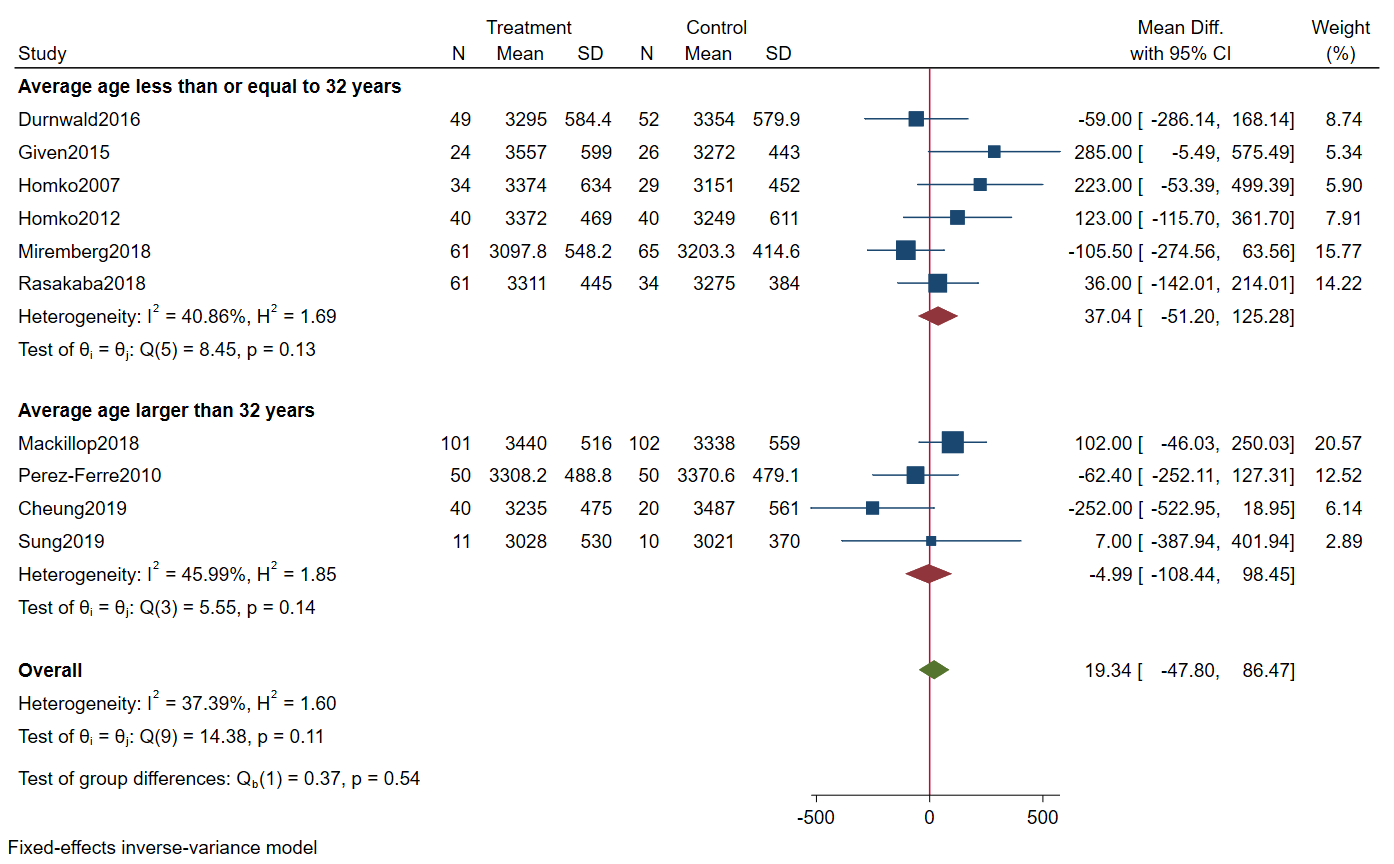


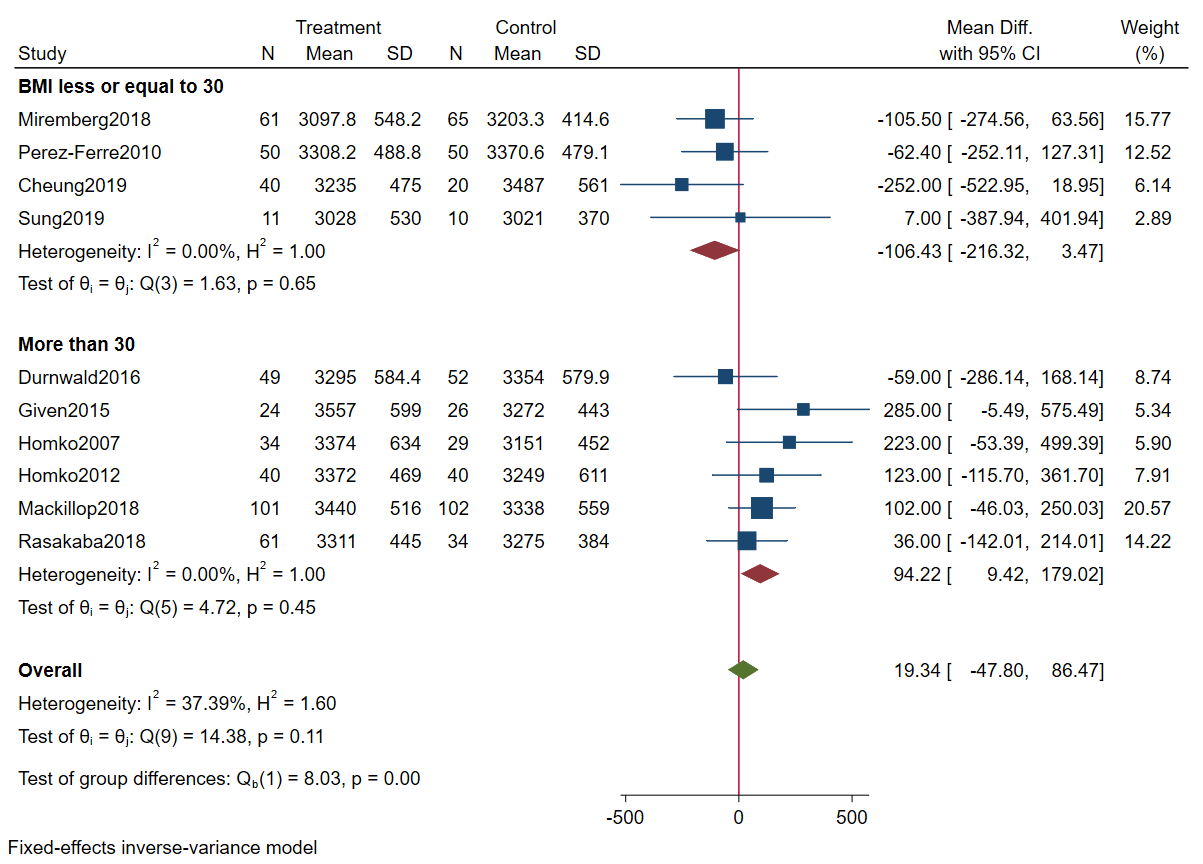


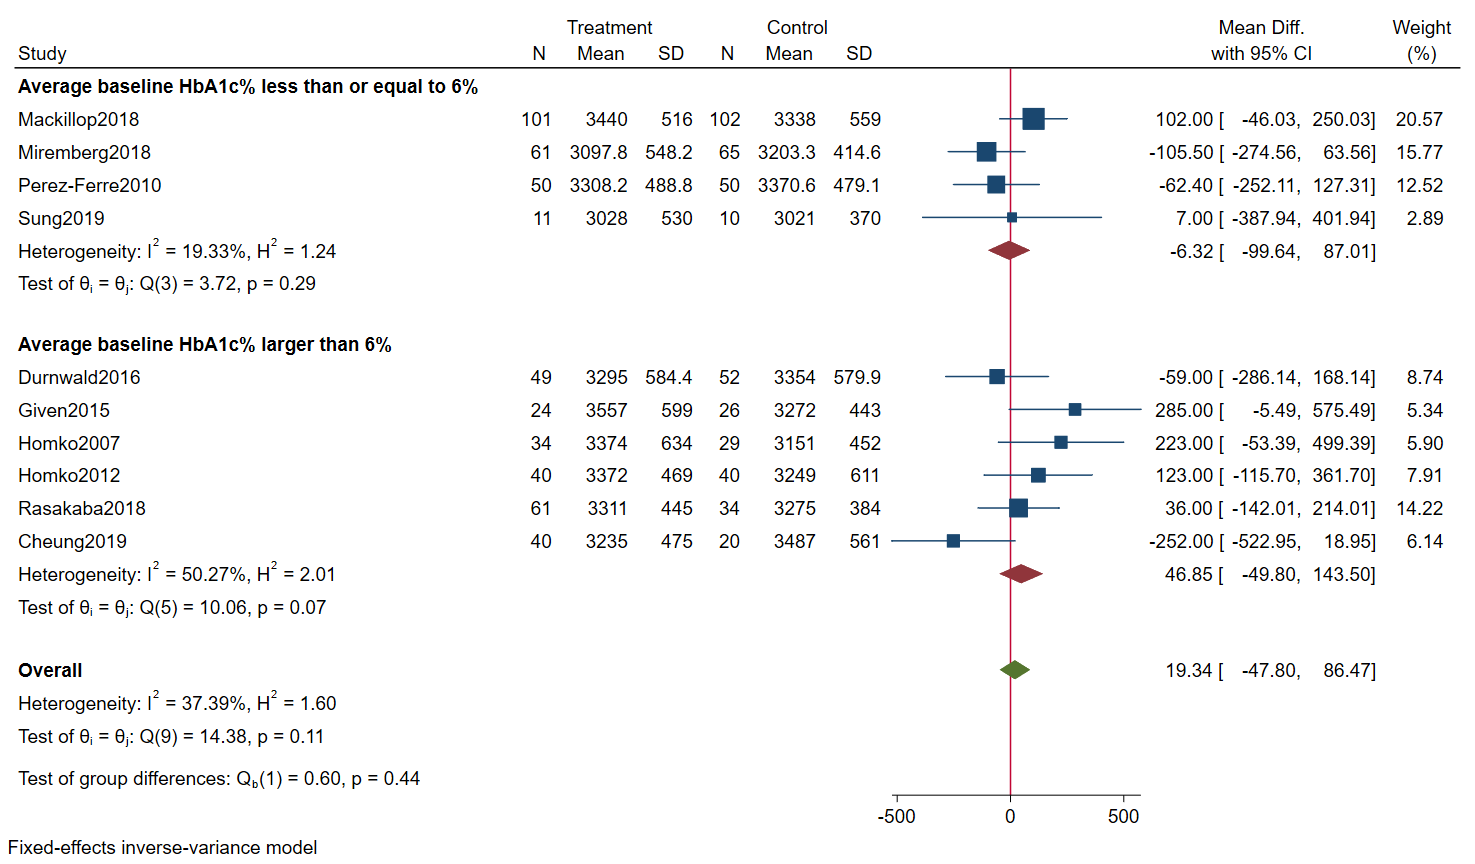


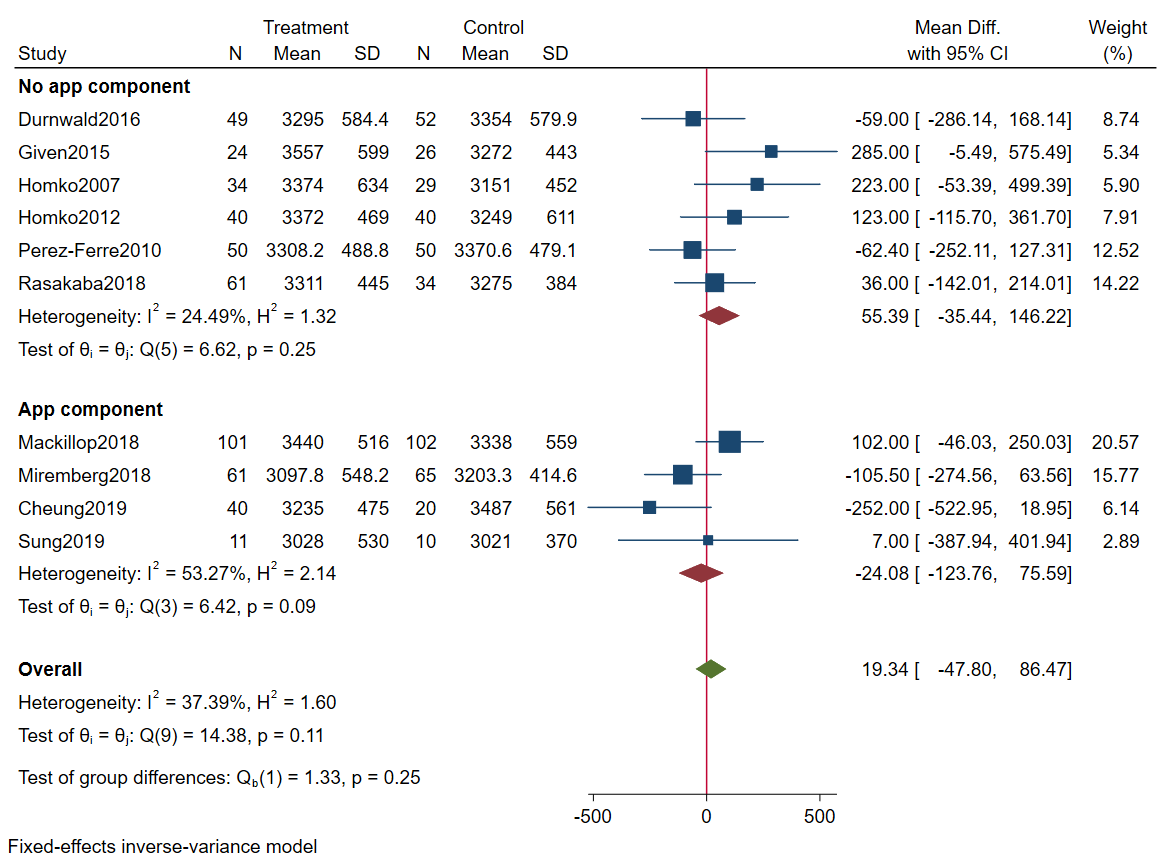


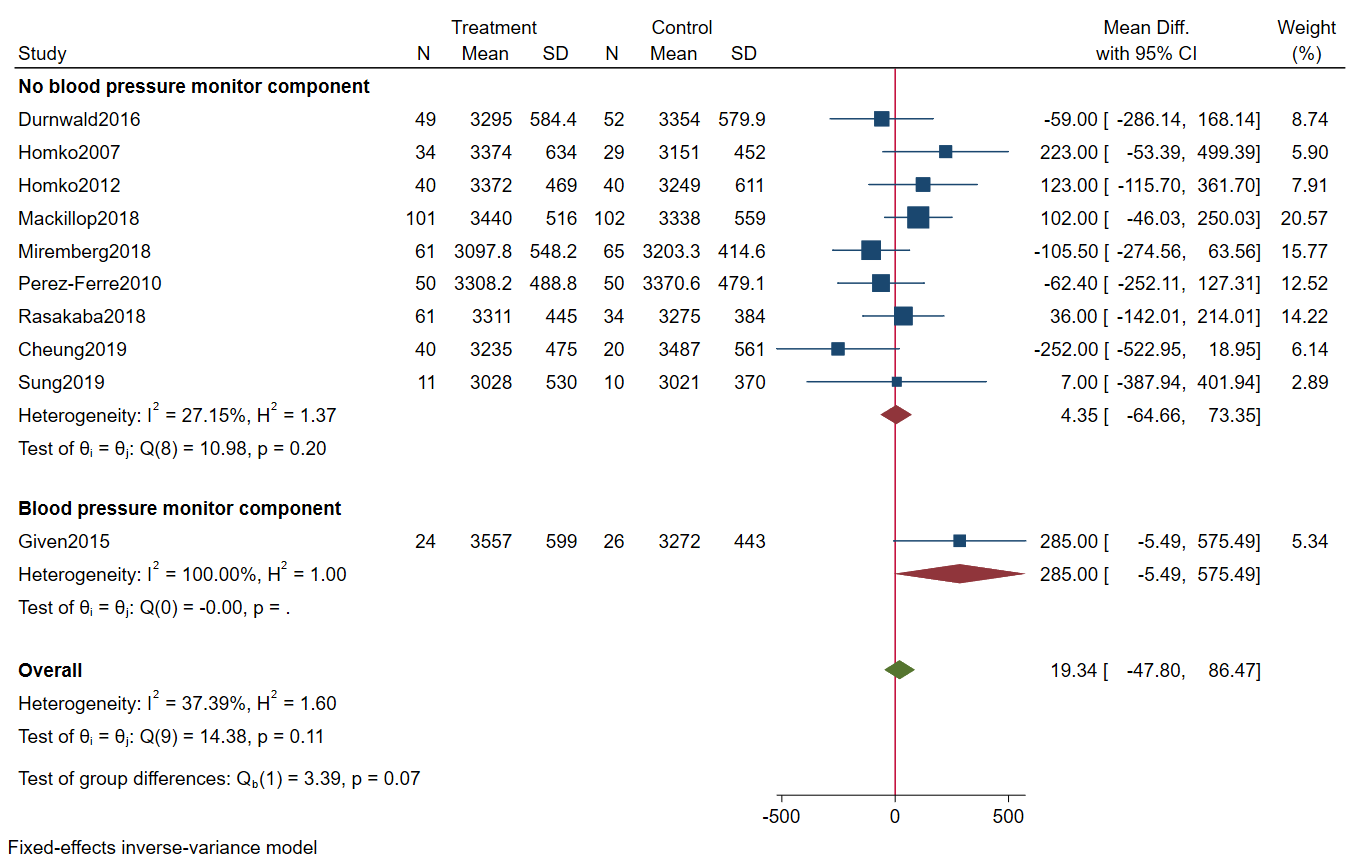


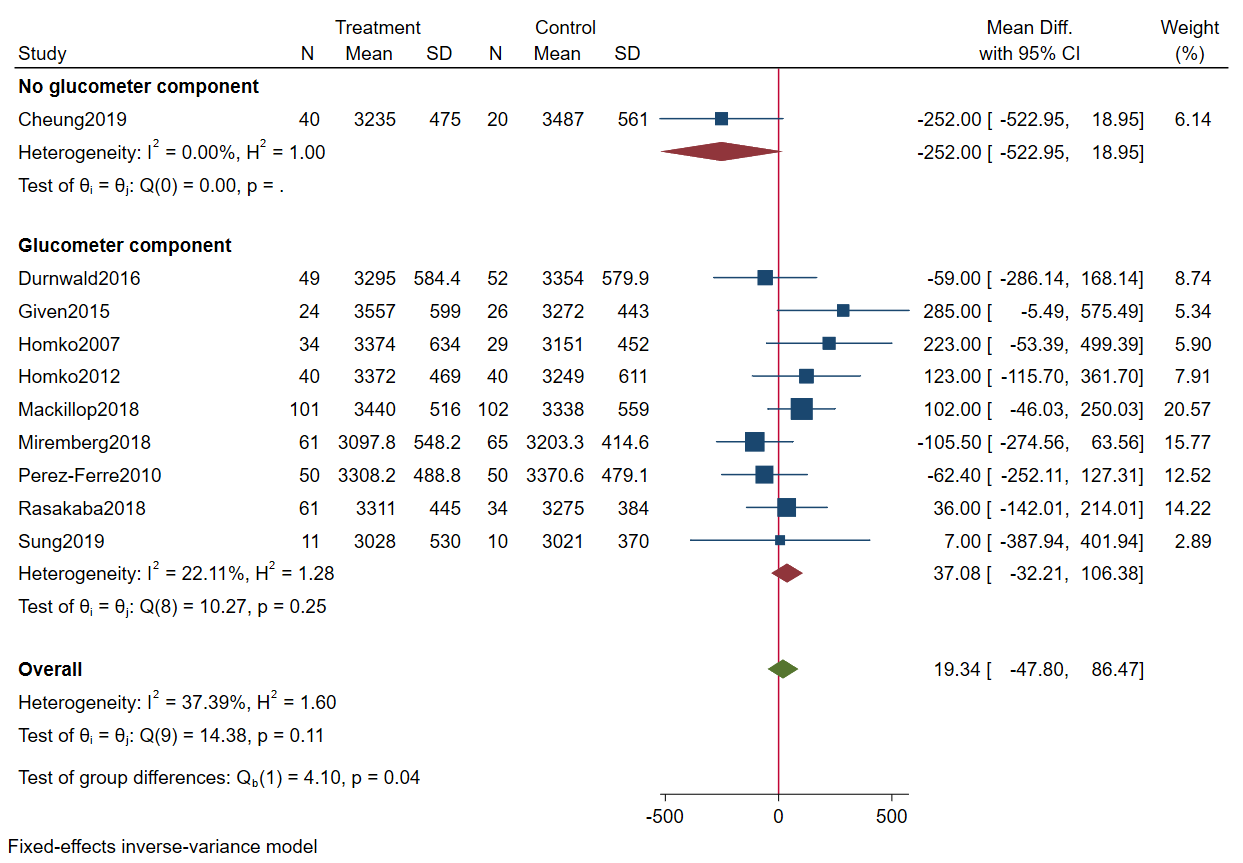


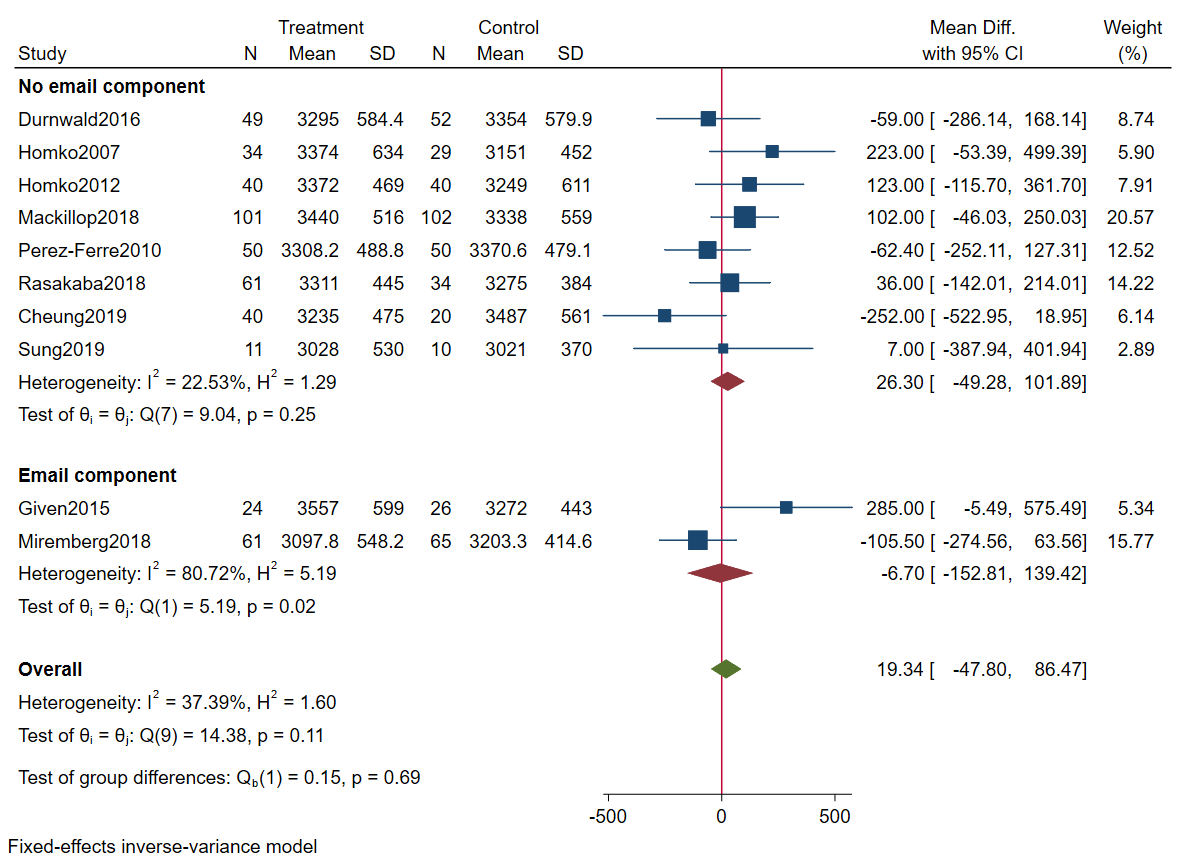


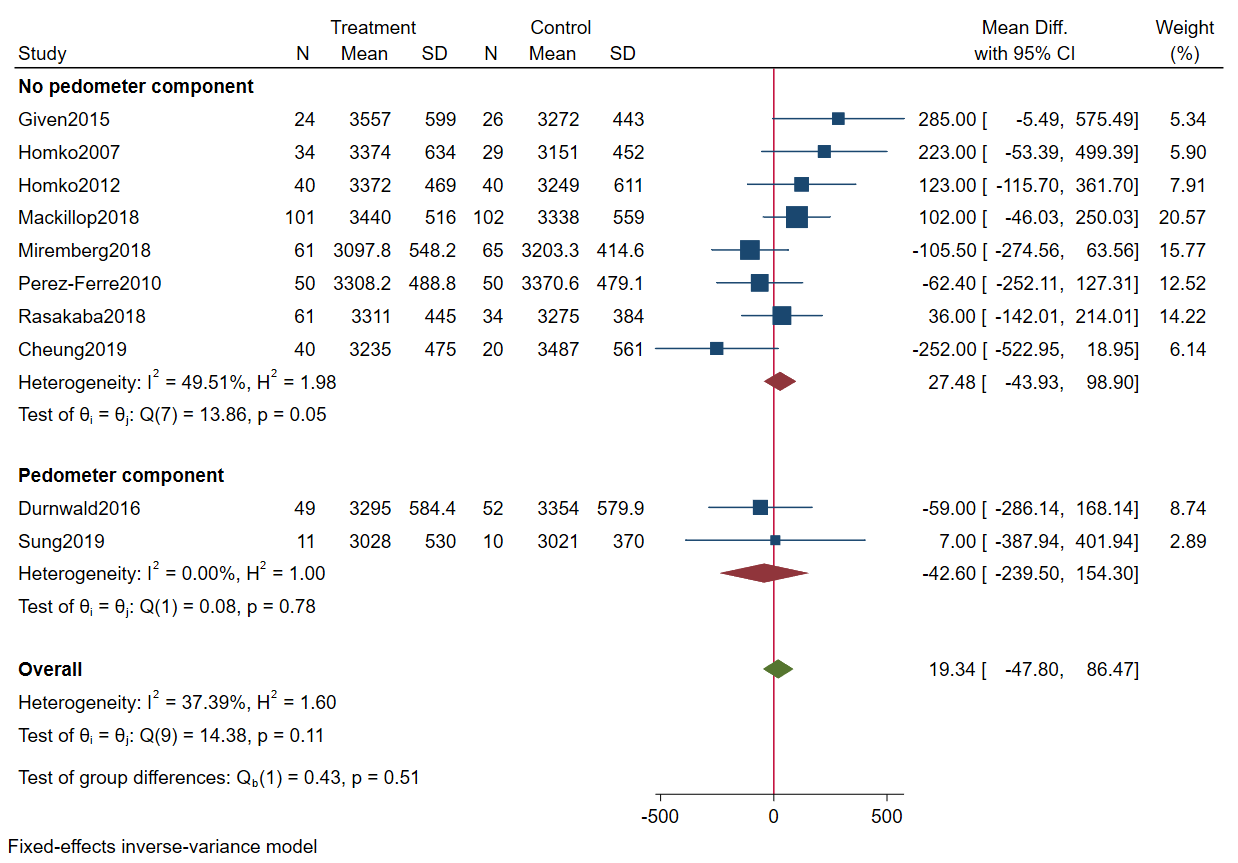


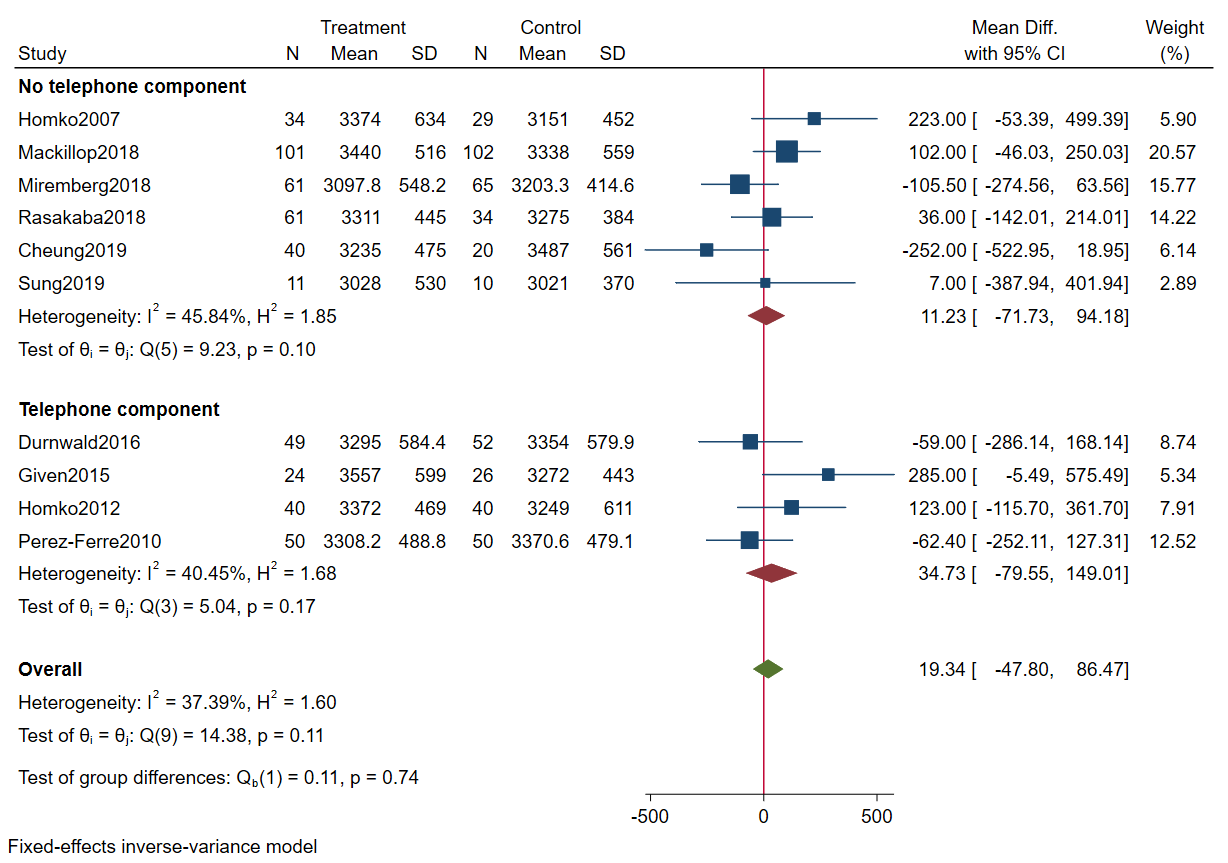


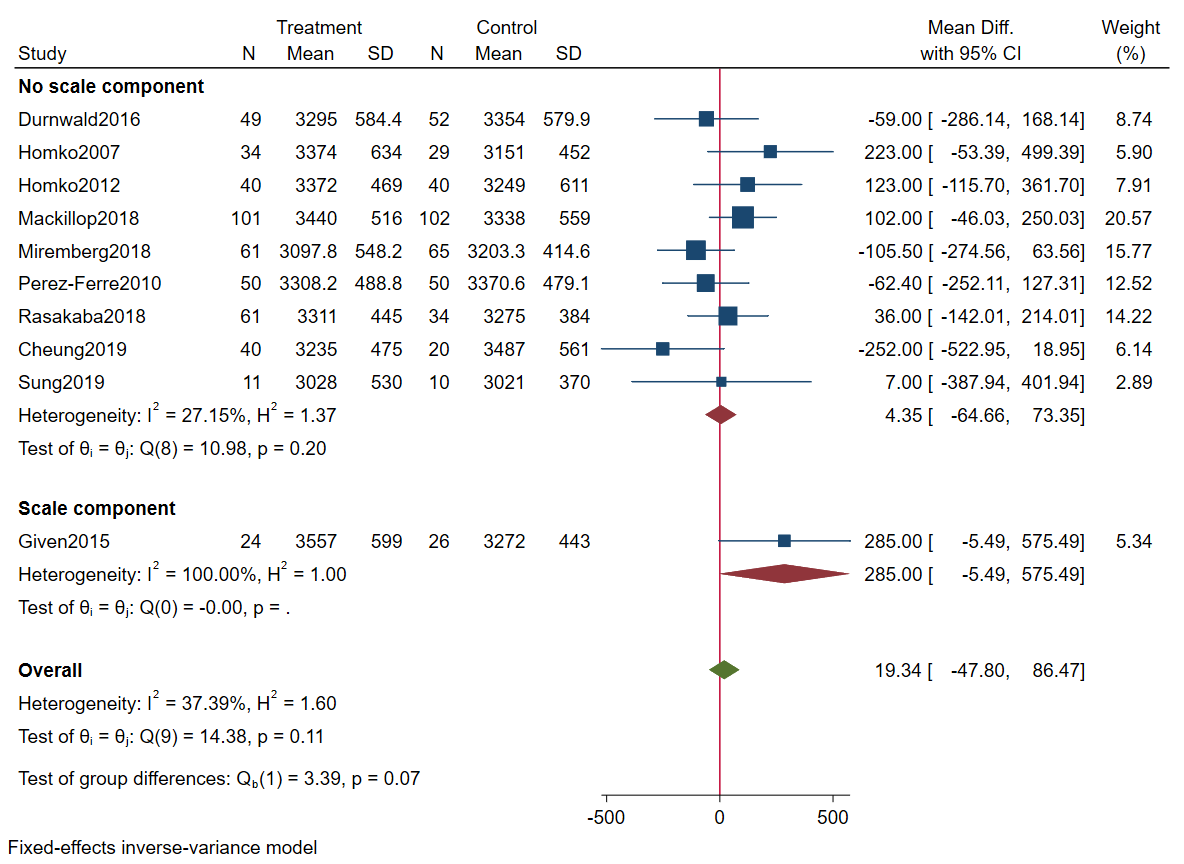


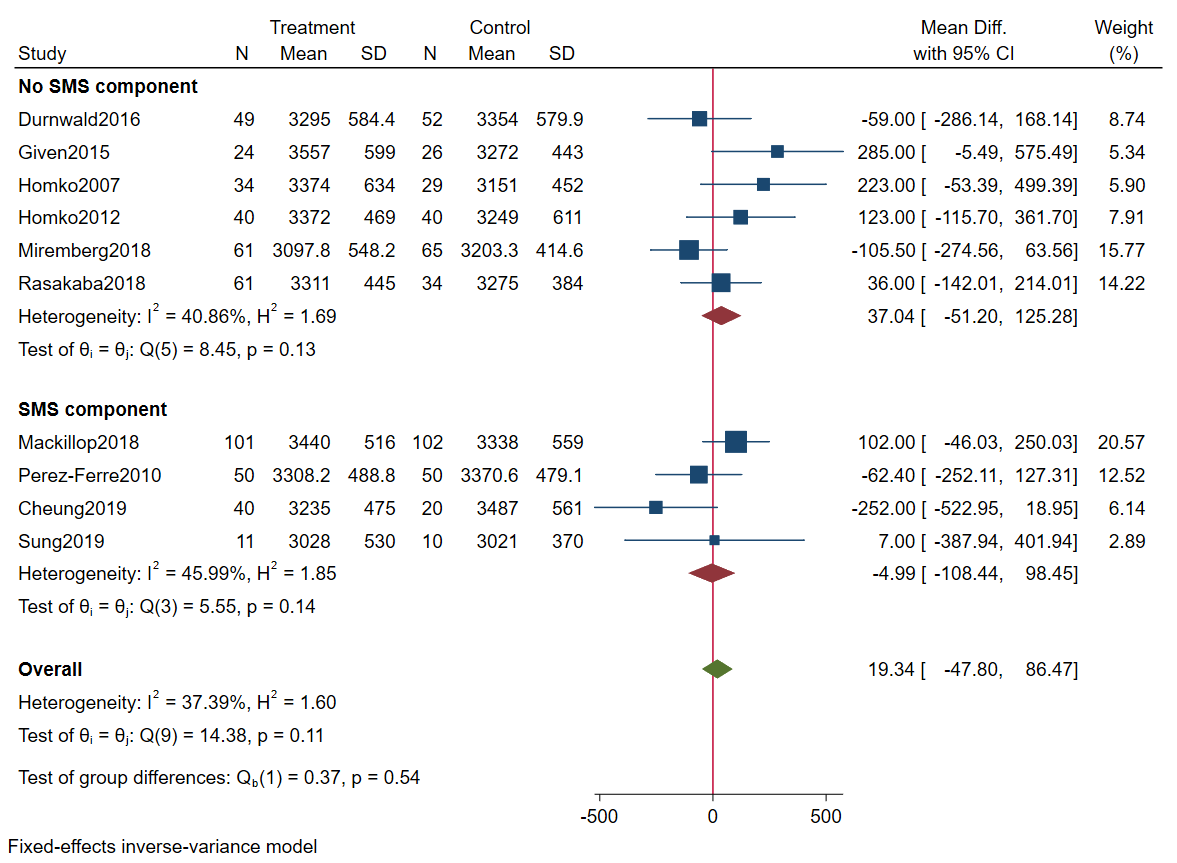


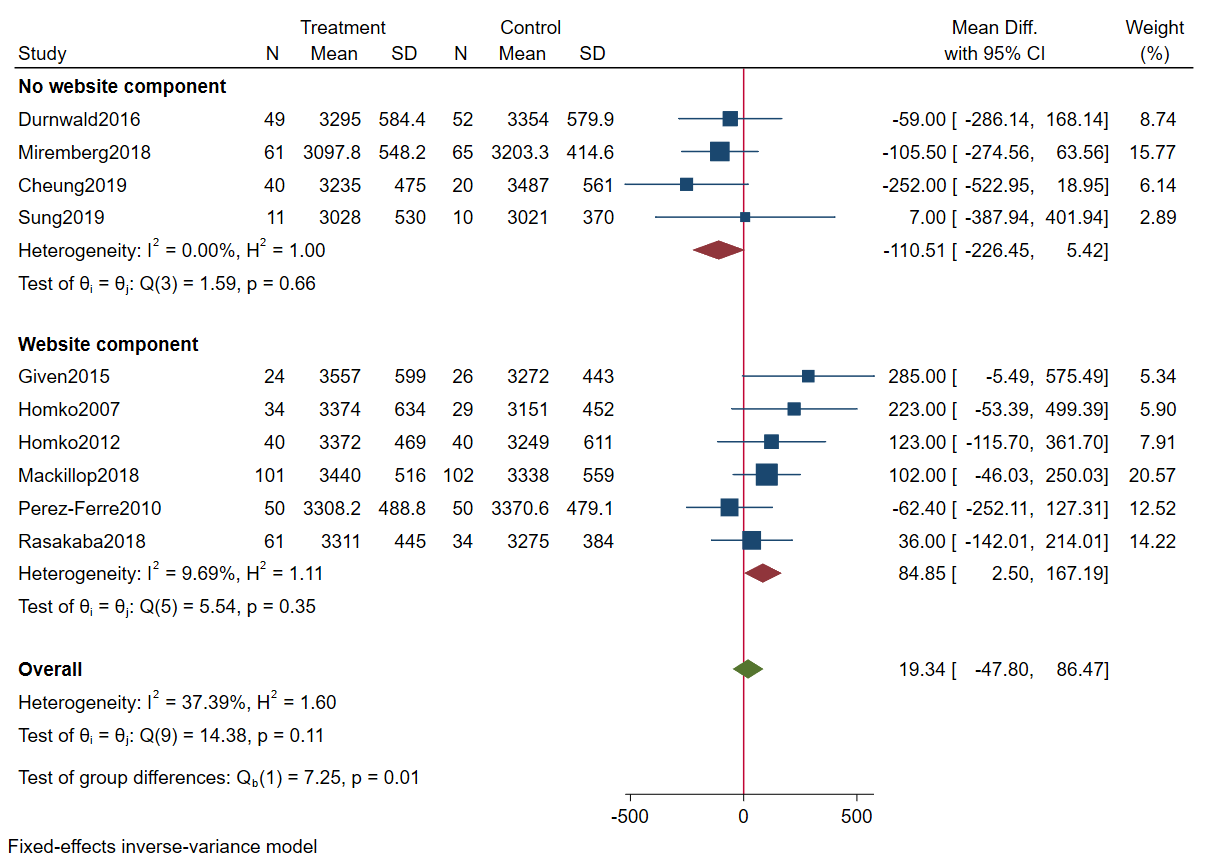


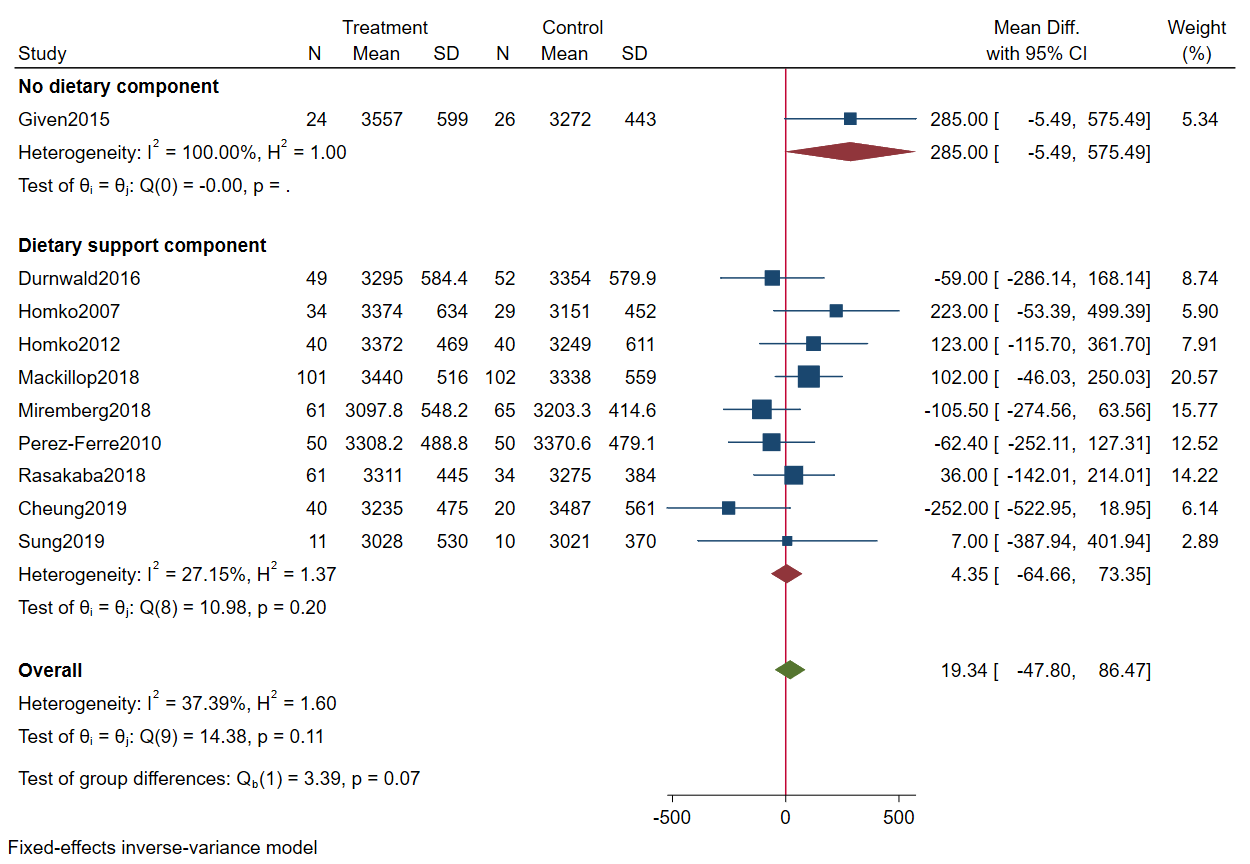


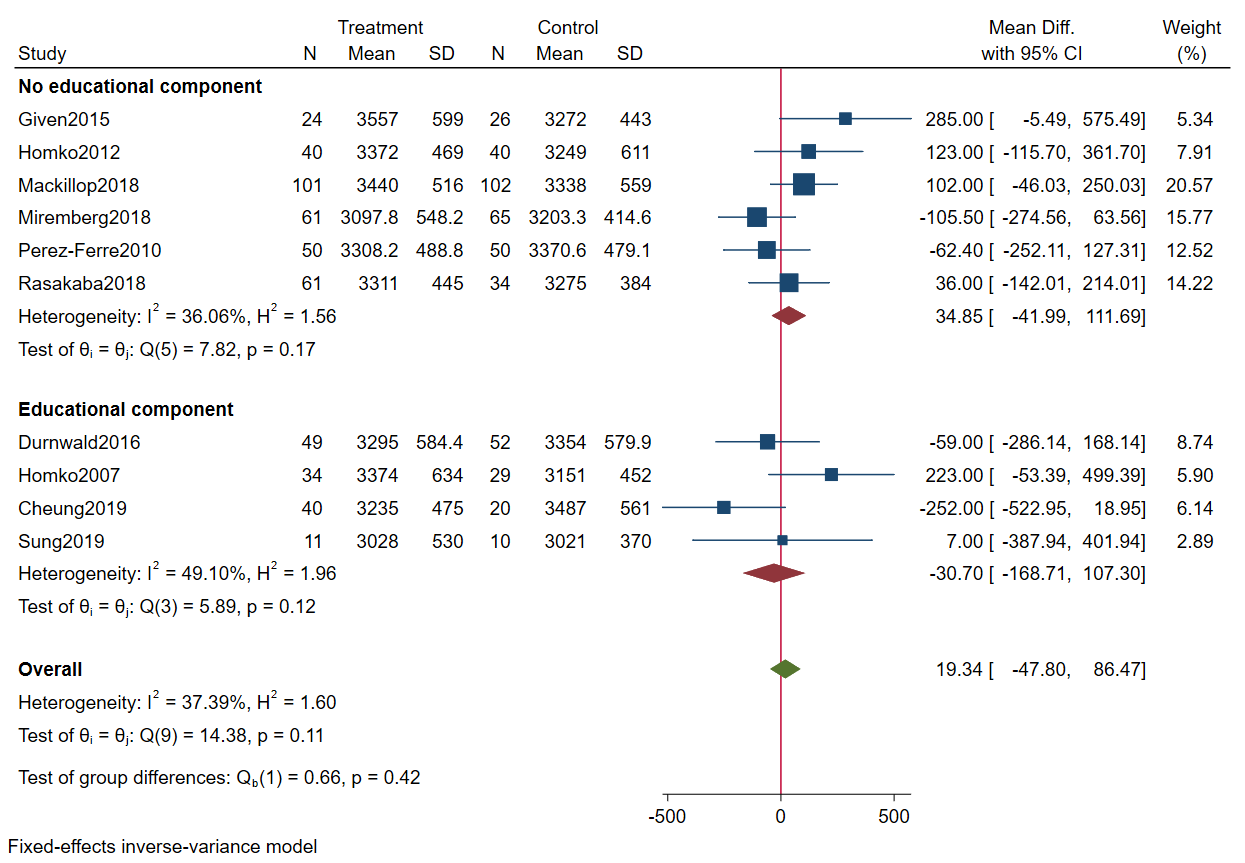


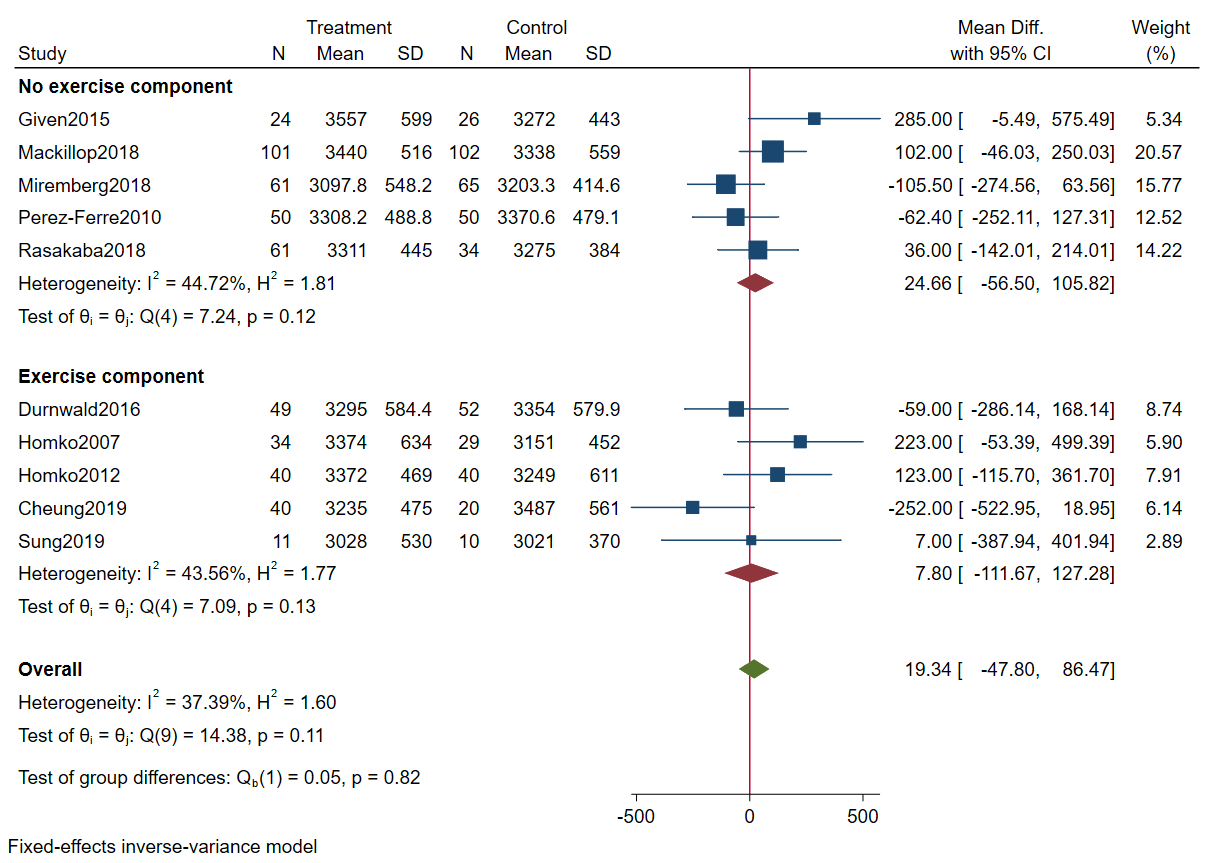


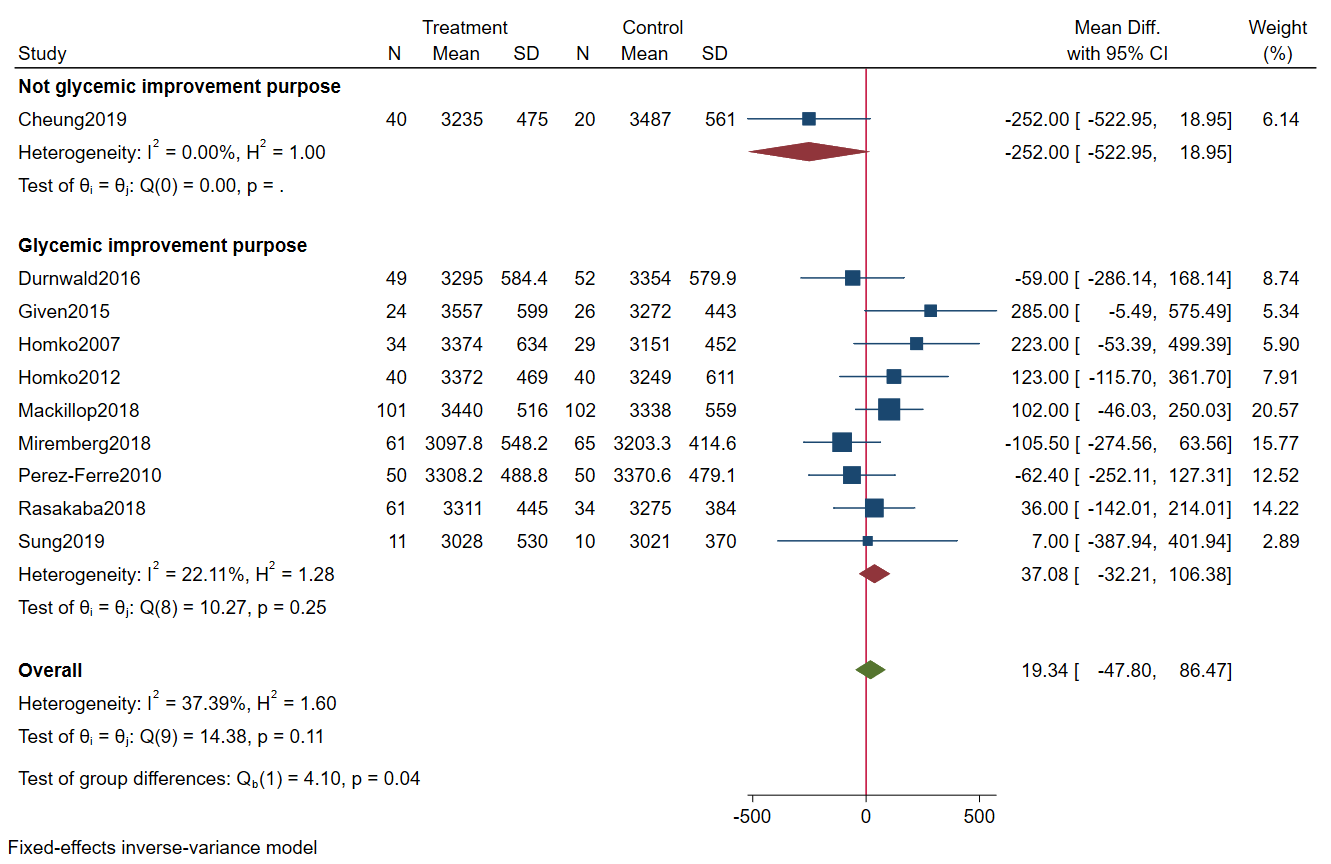


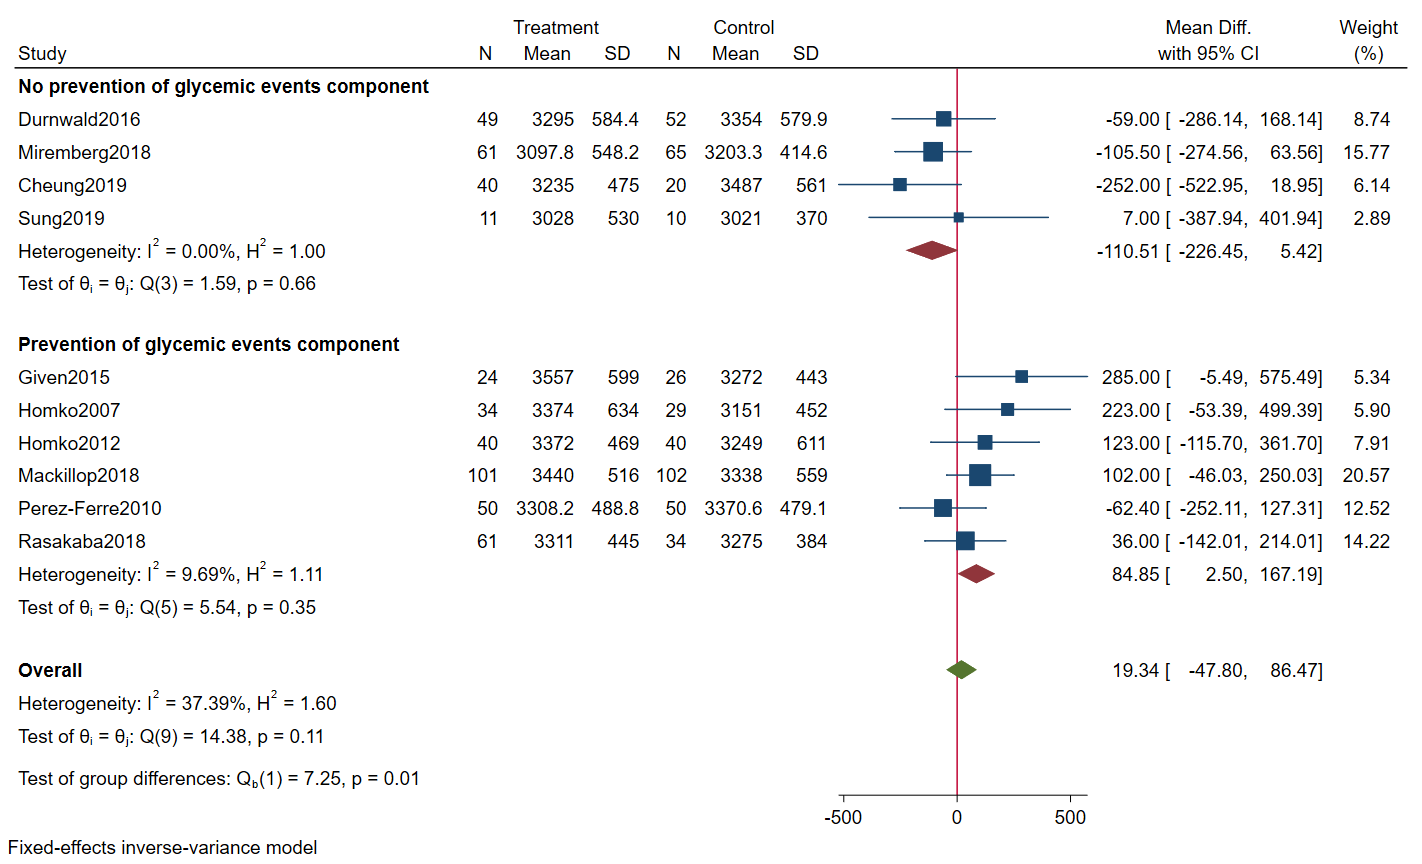


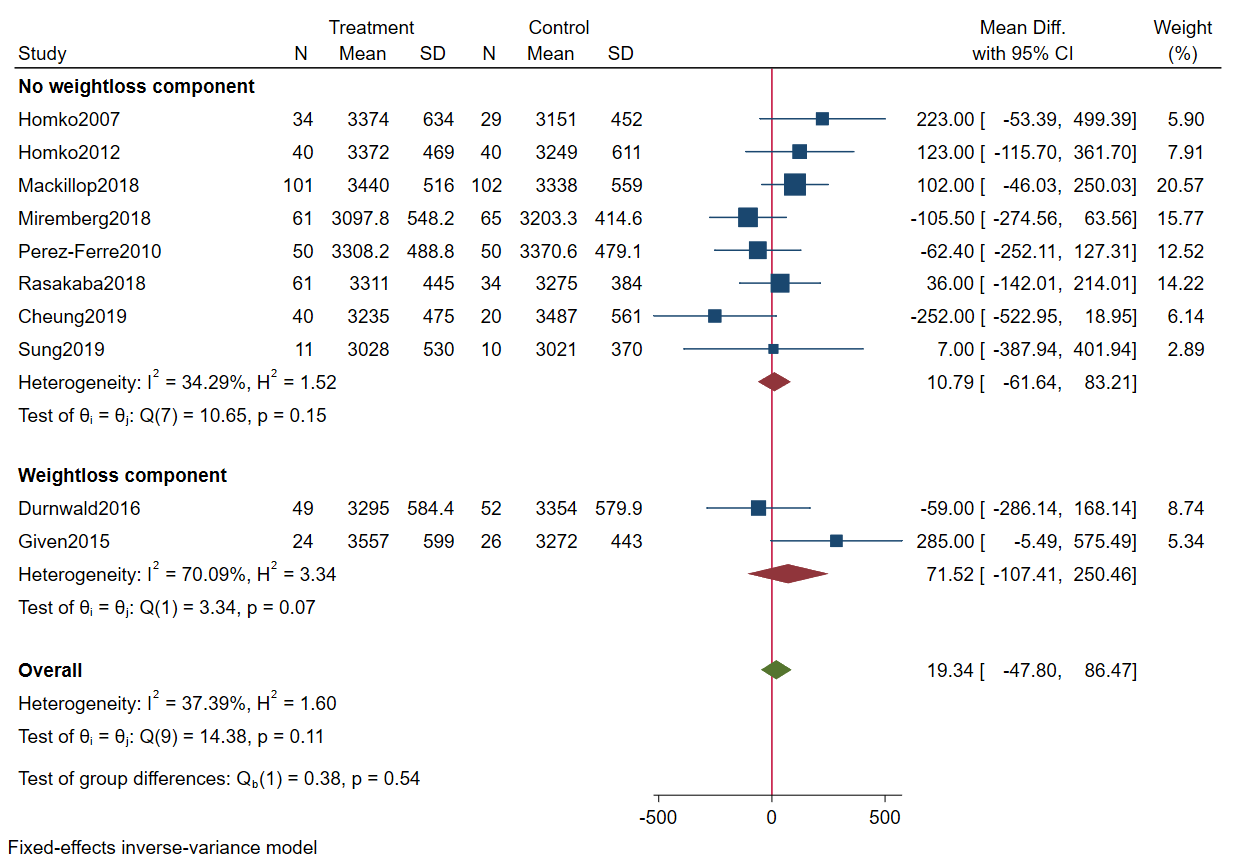


Appendix 4: Sensitivity analysis (Results excluding Given et al. and Cheung et. al.)


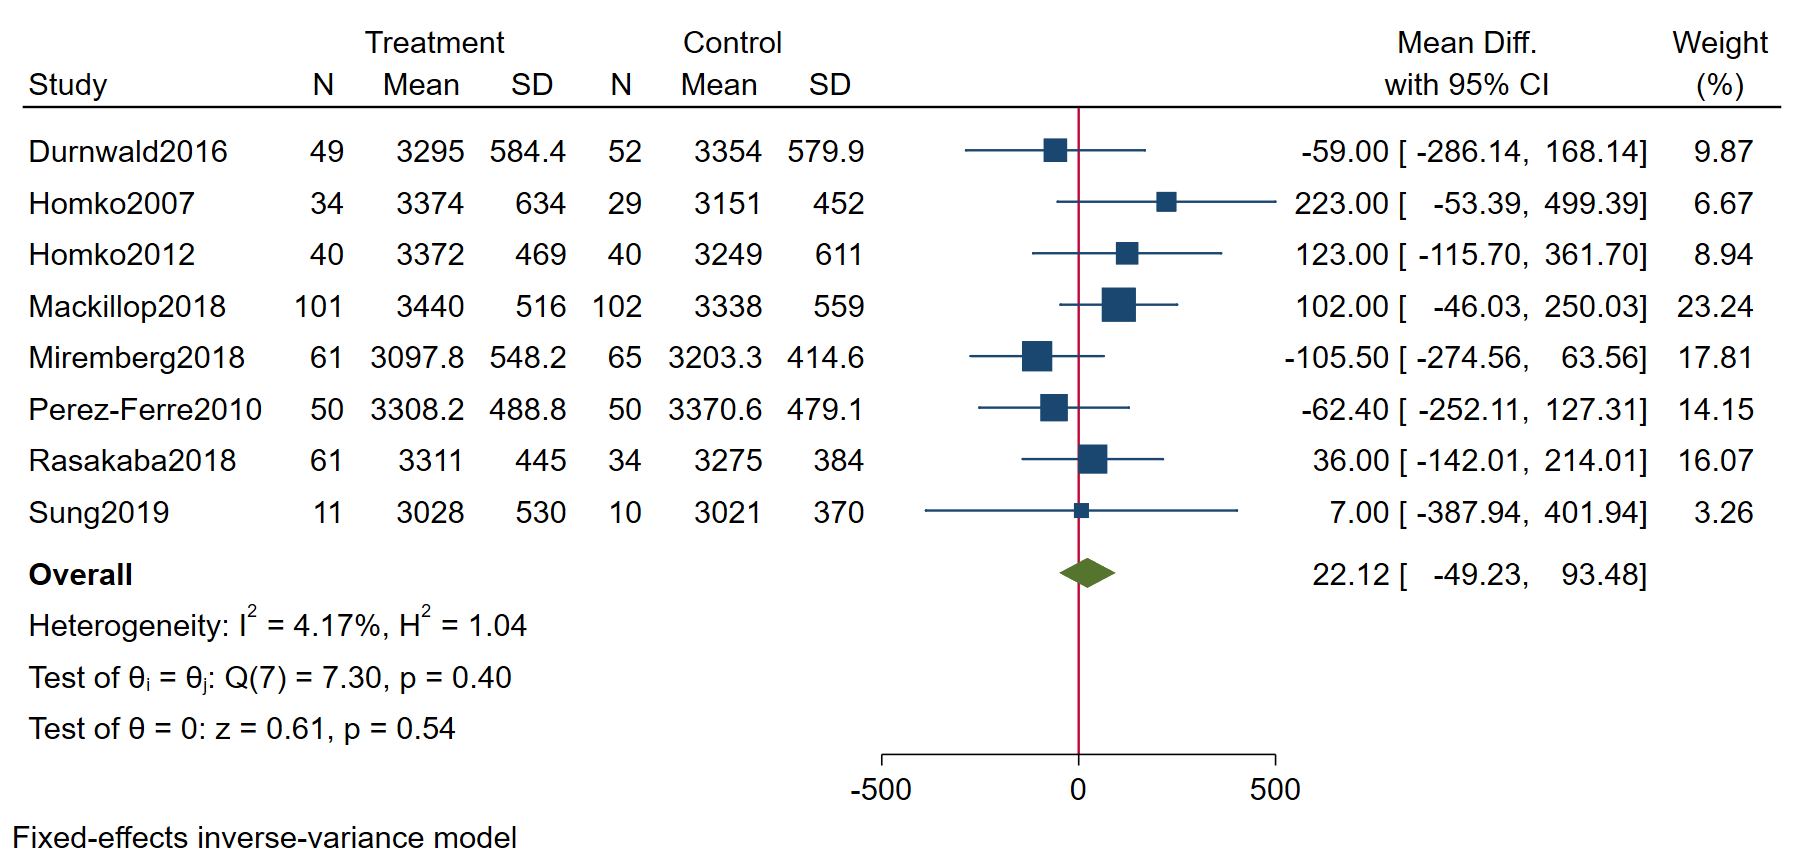


Appendix 5: Meta-analyses of secondary outcomes (maternal)


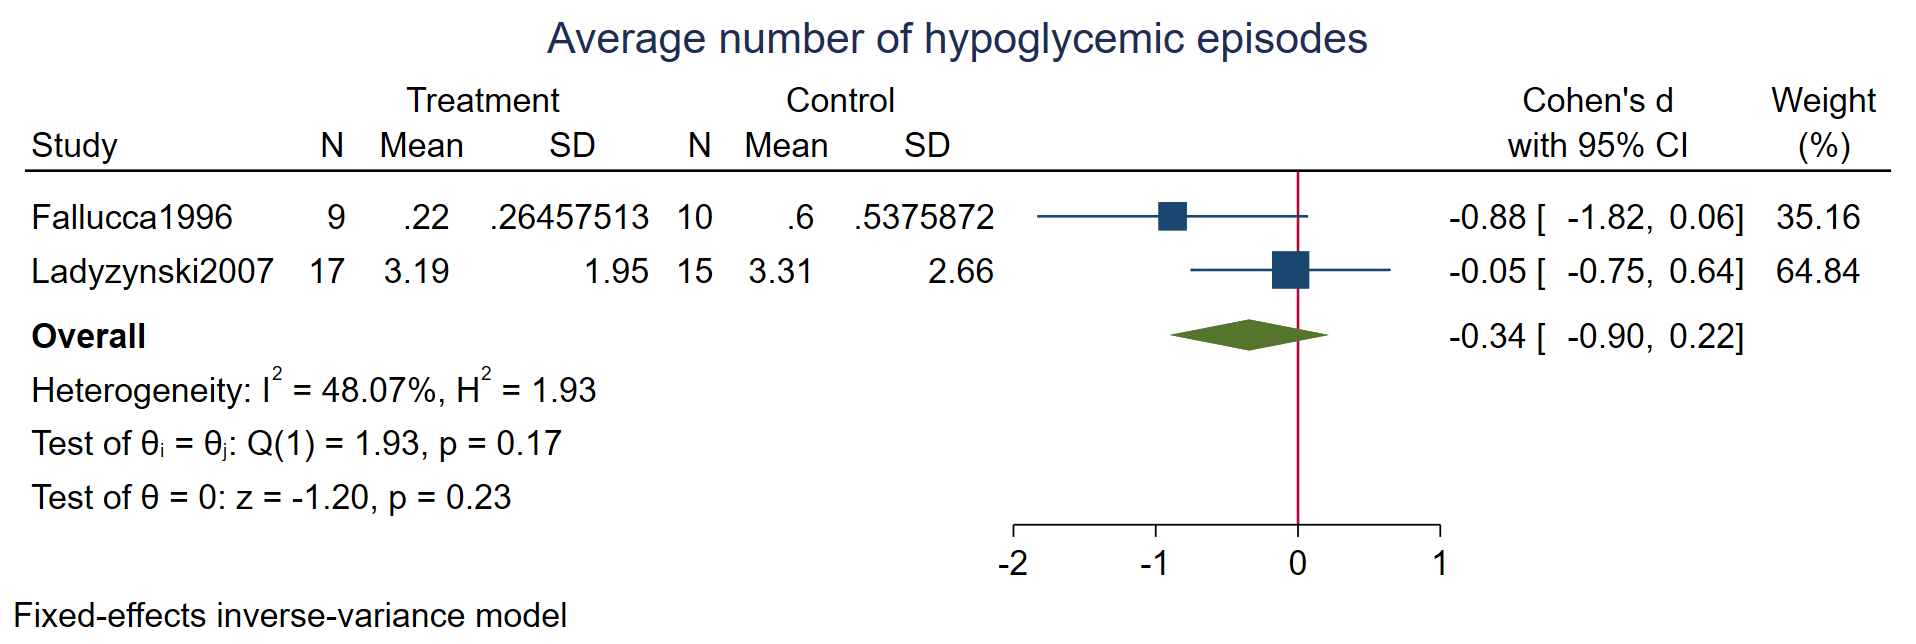


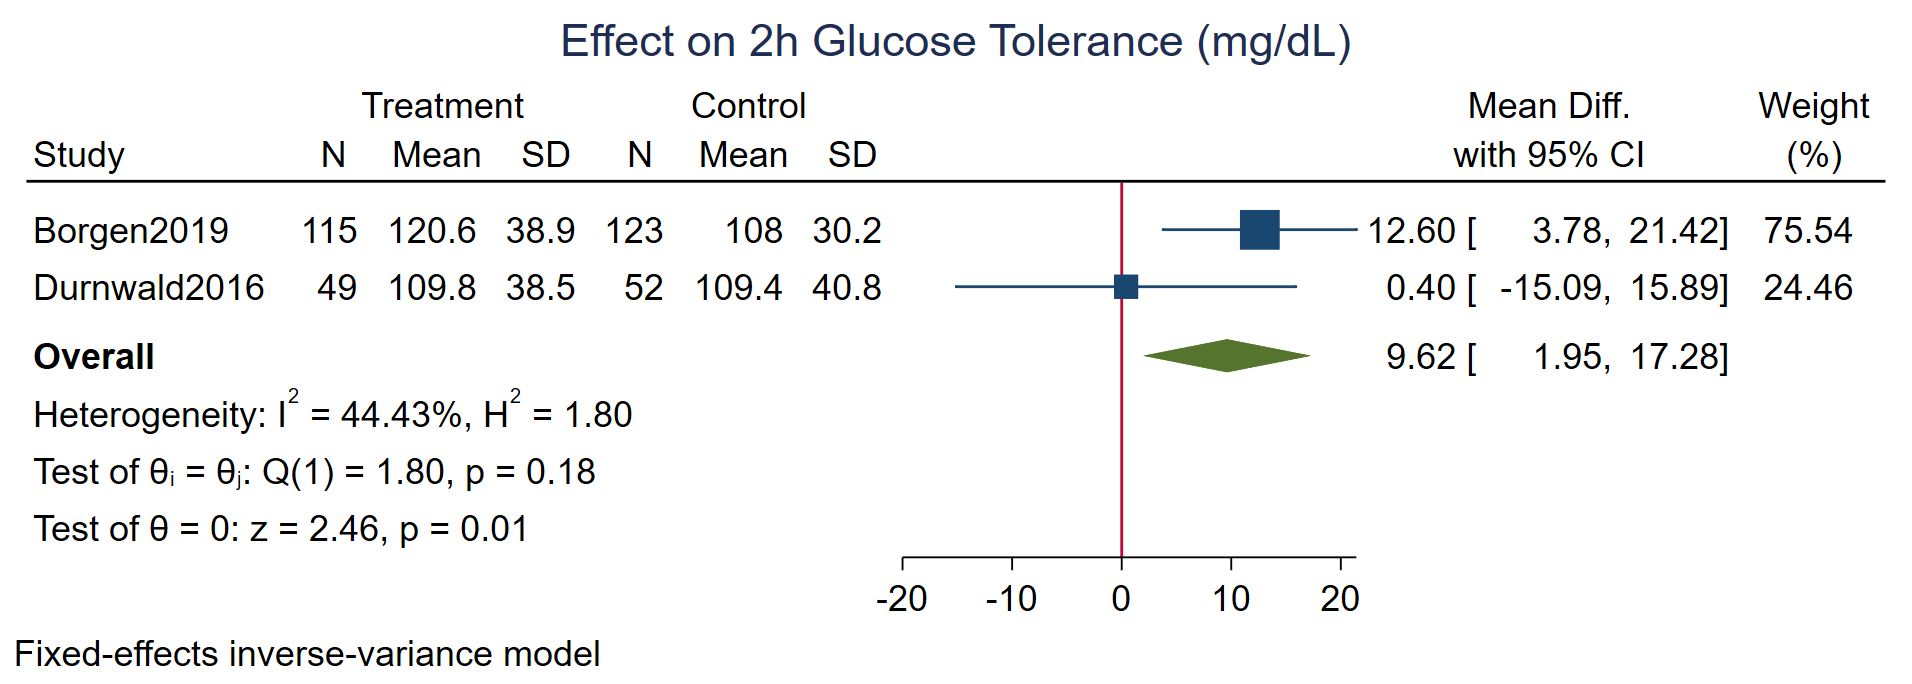


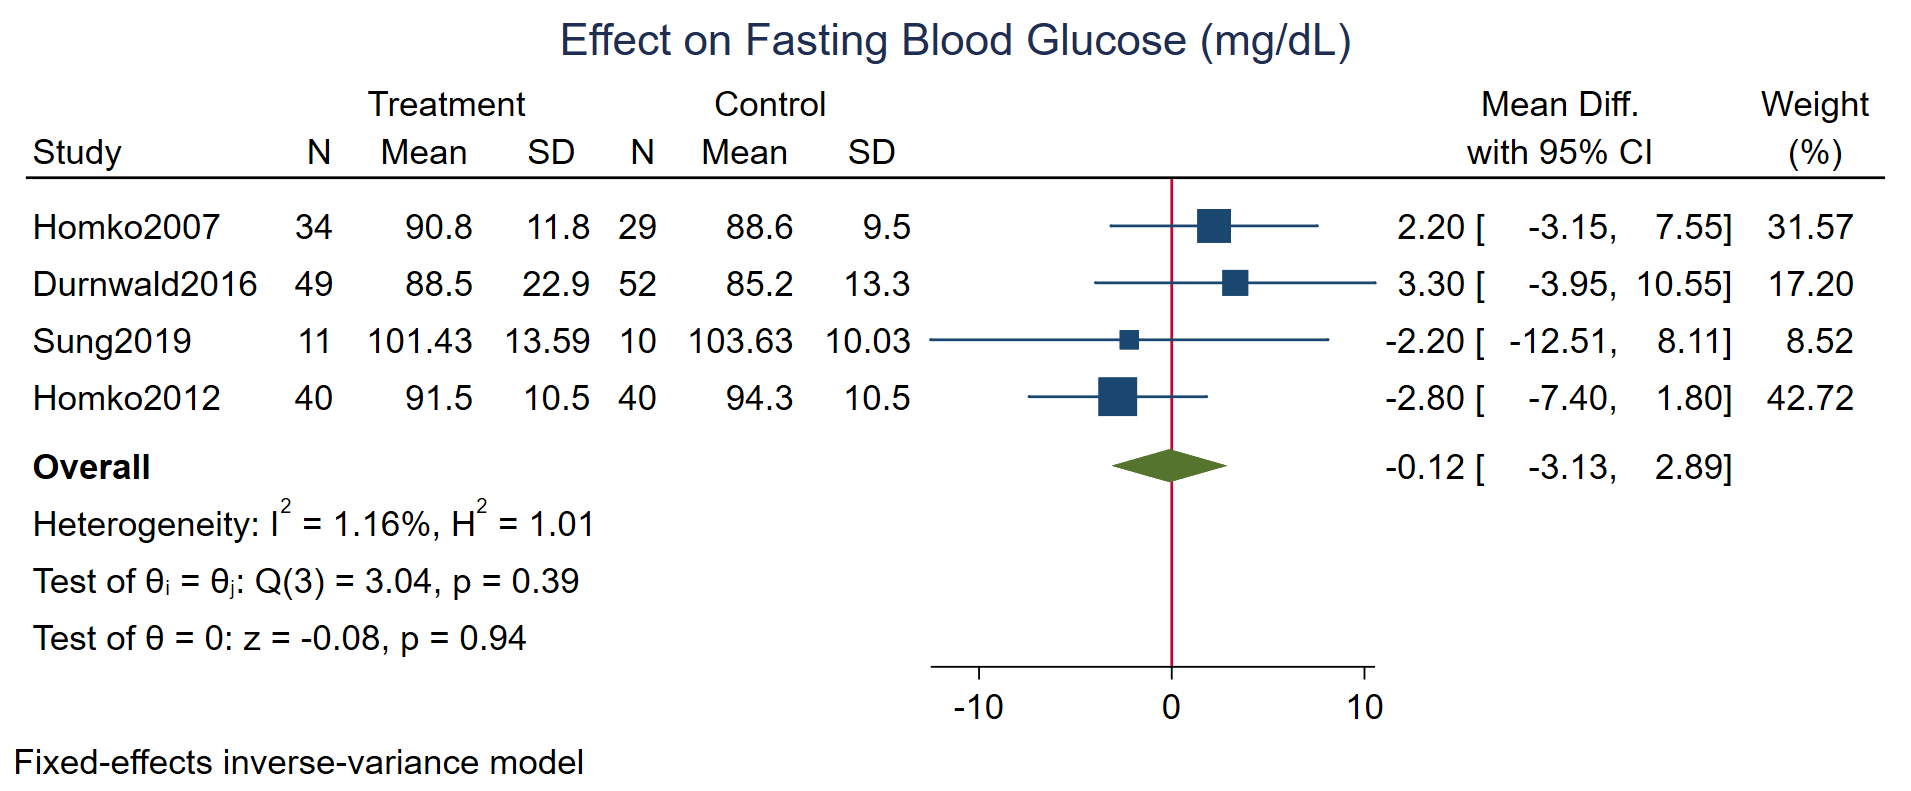


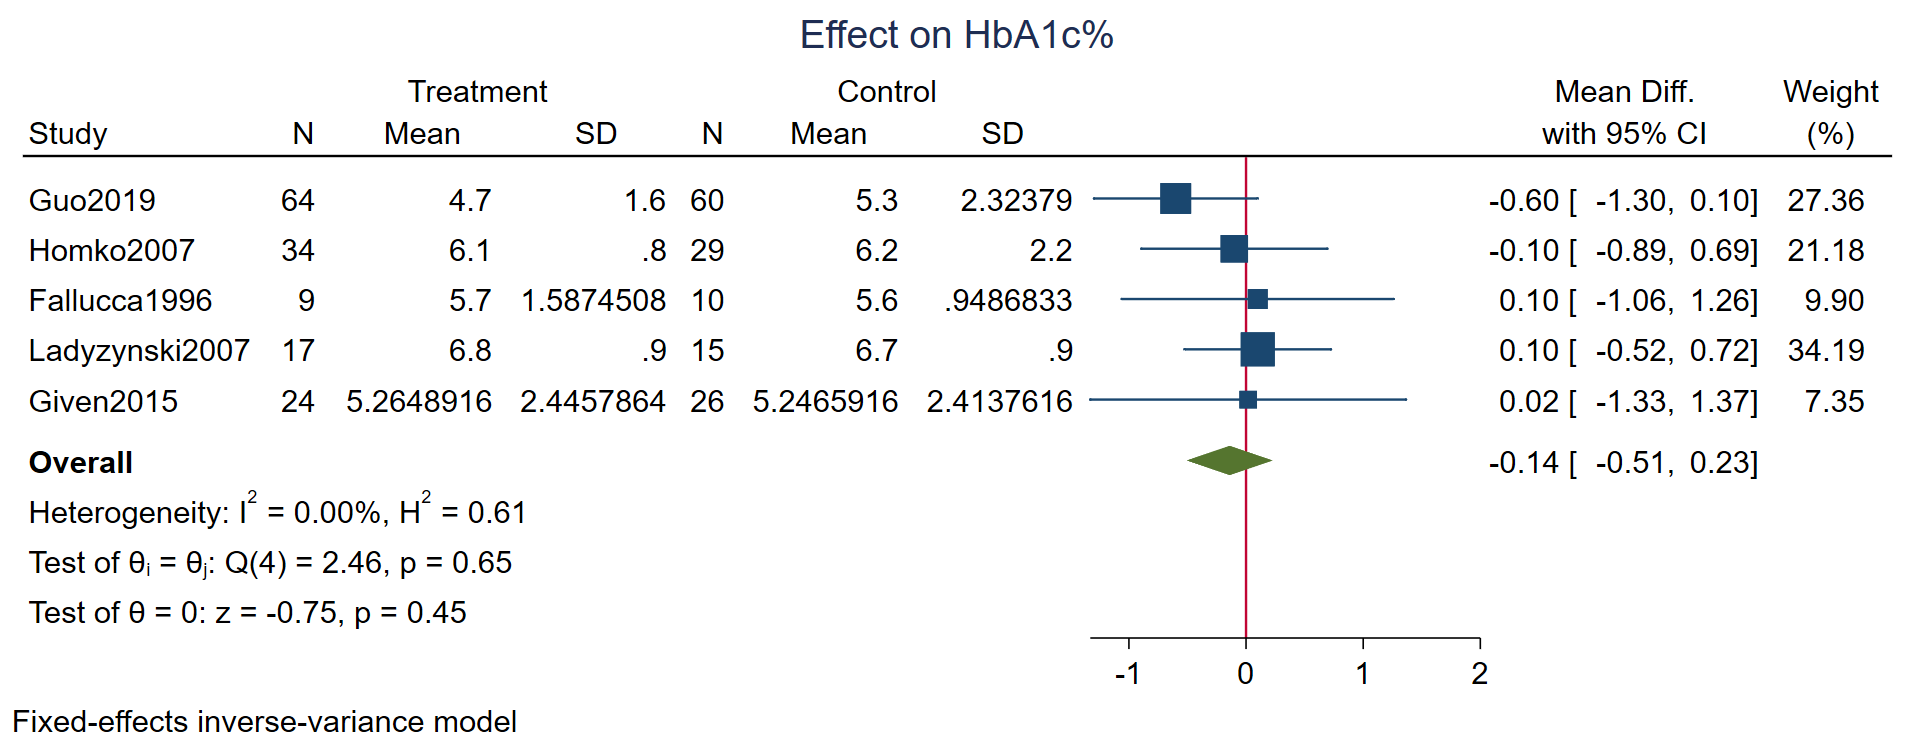


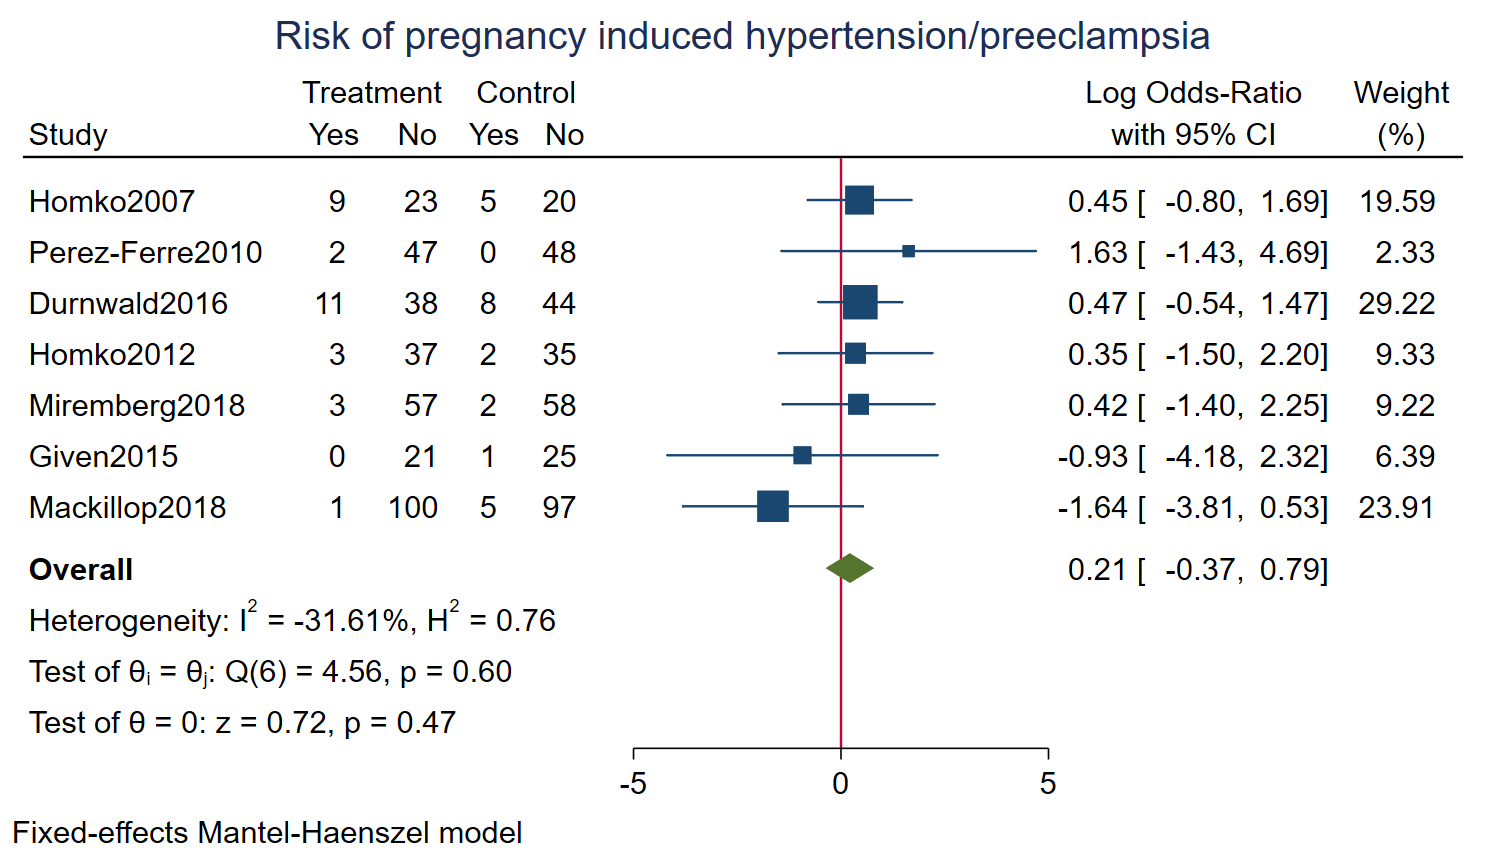


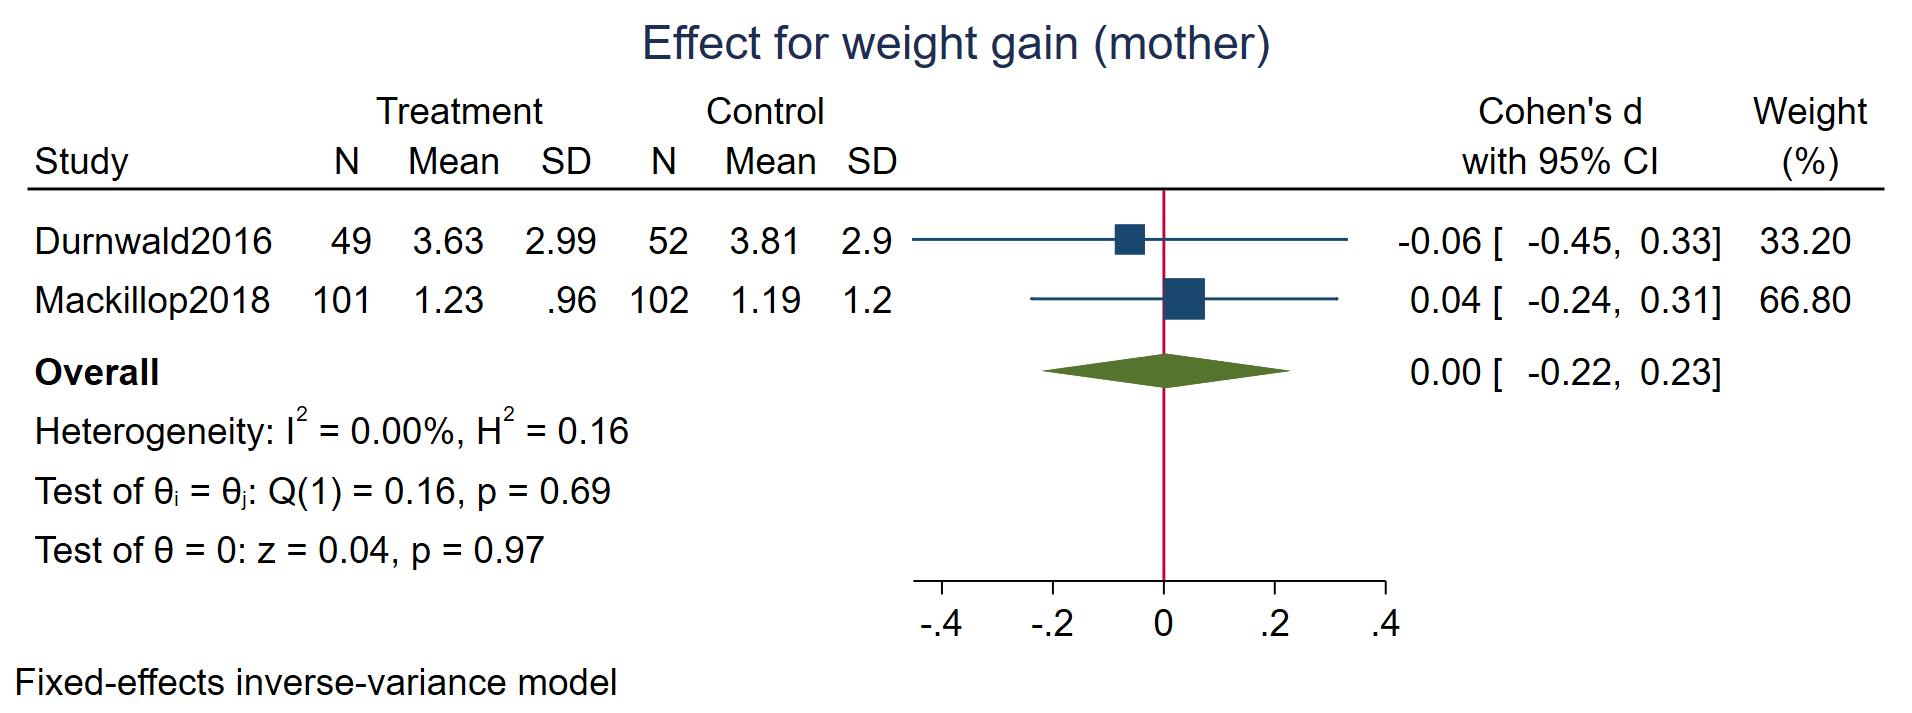


Appendix 6: Meta-analyses of secondary outcomes (delivery)


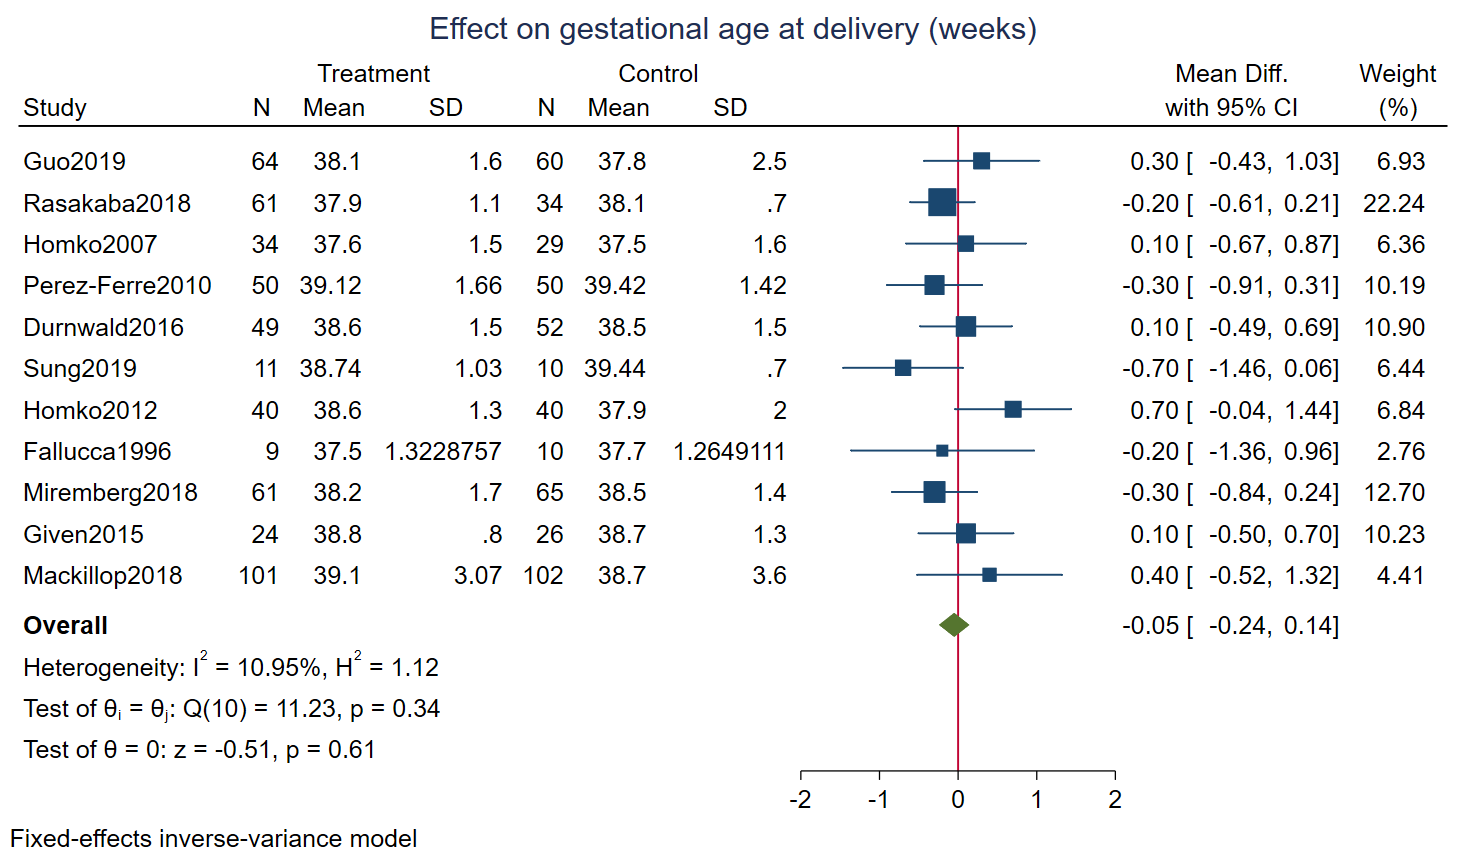


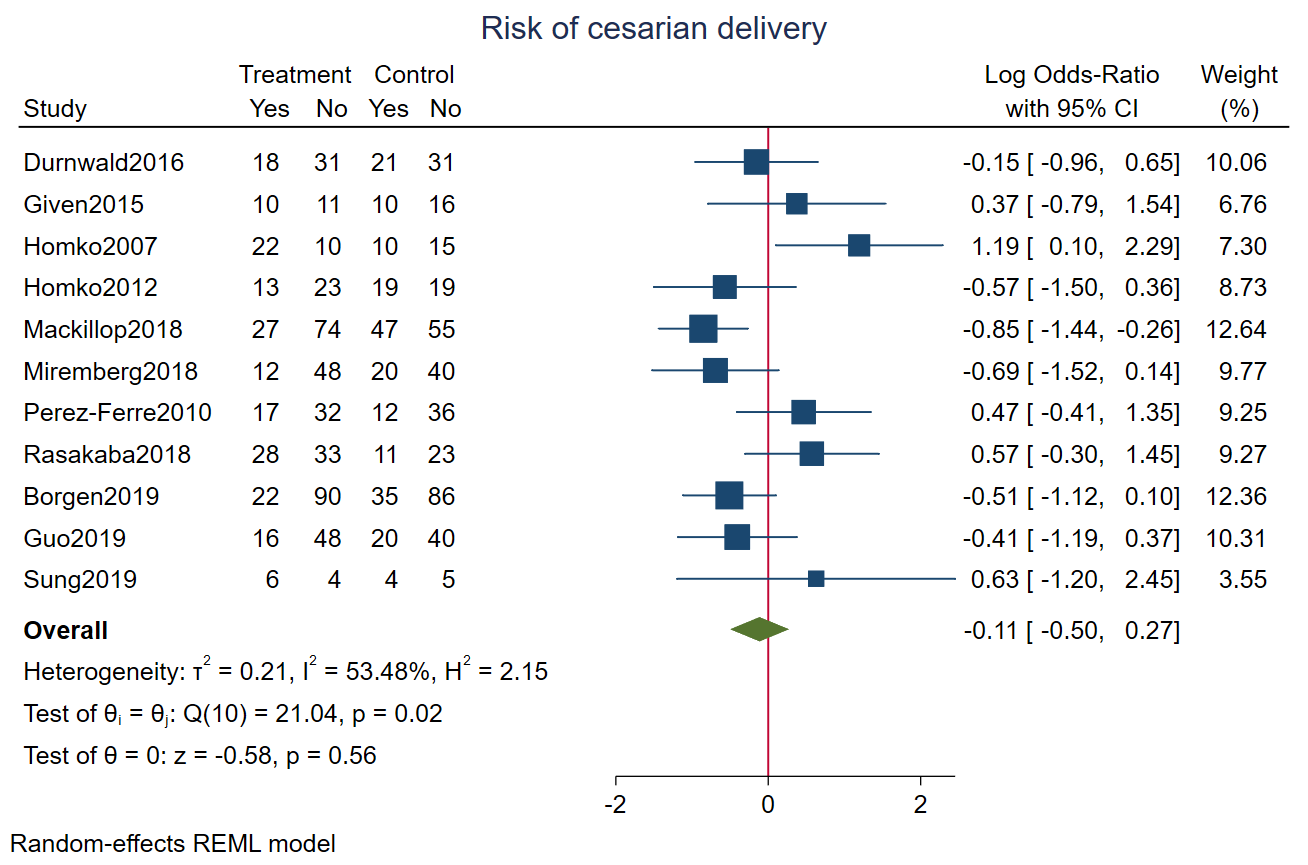


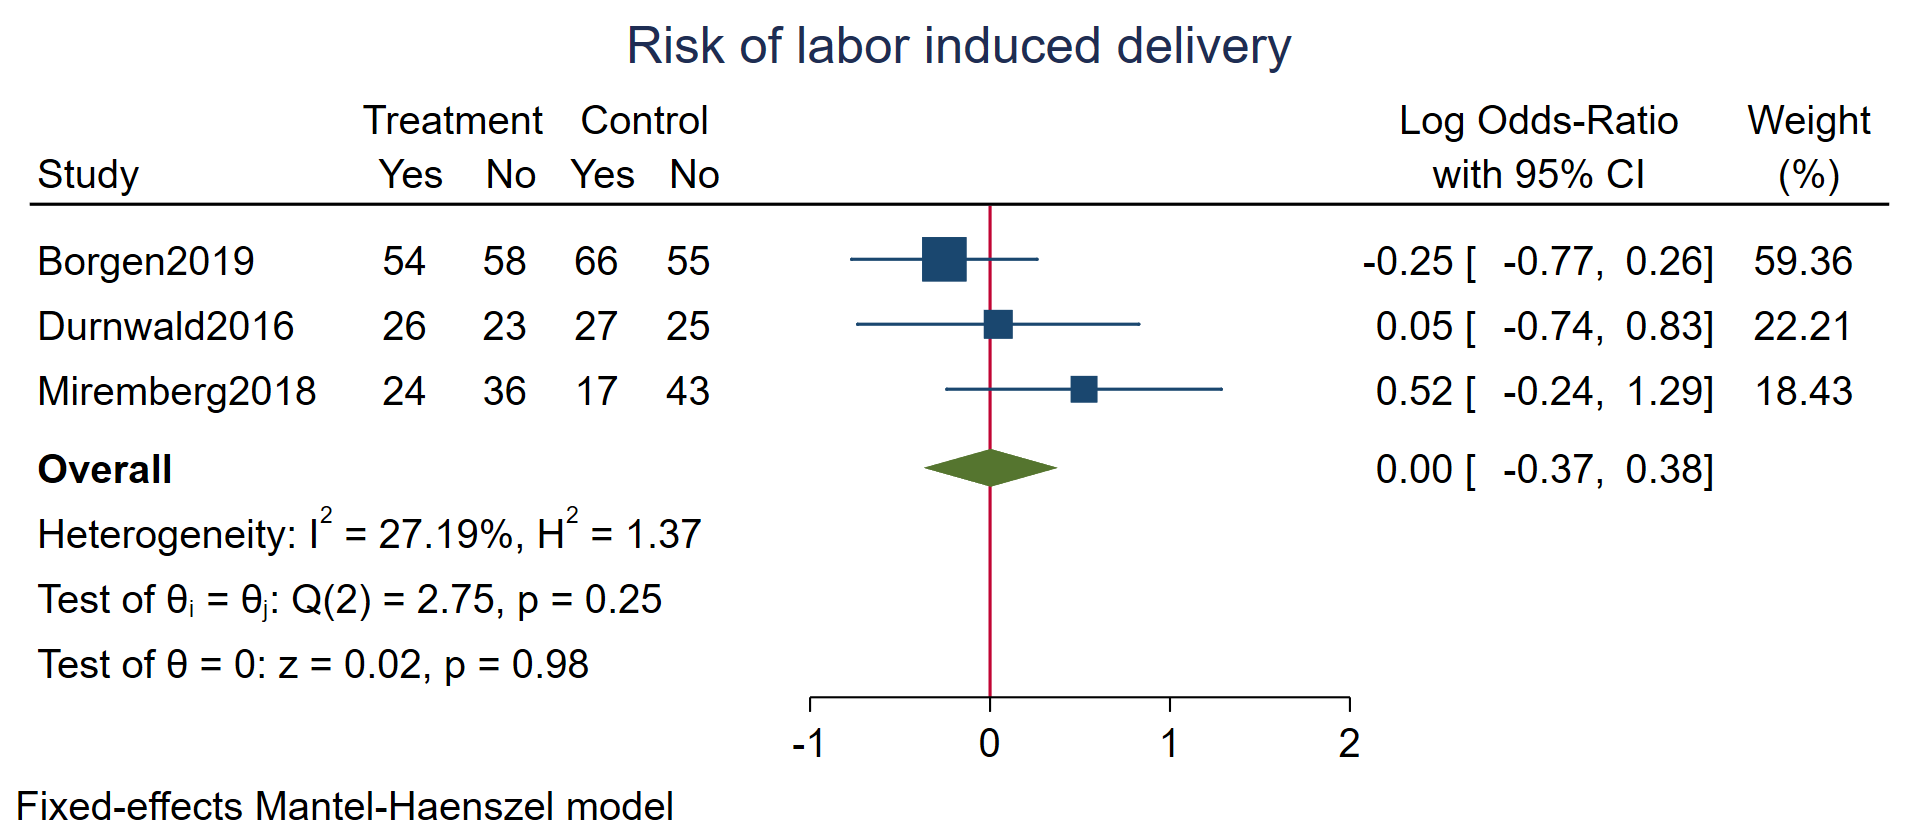

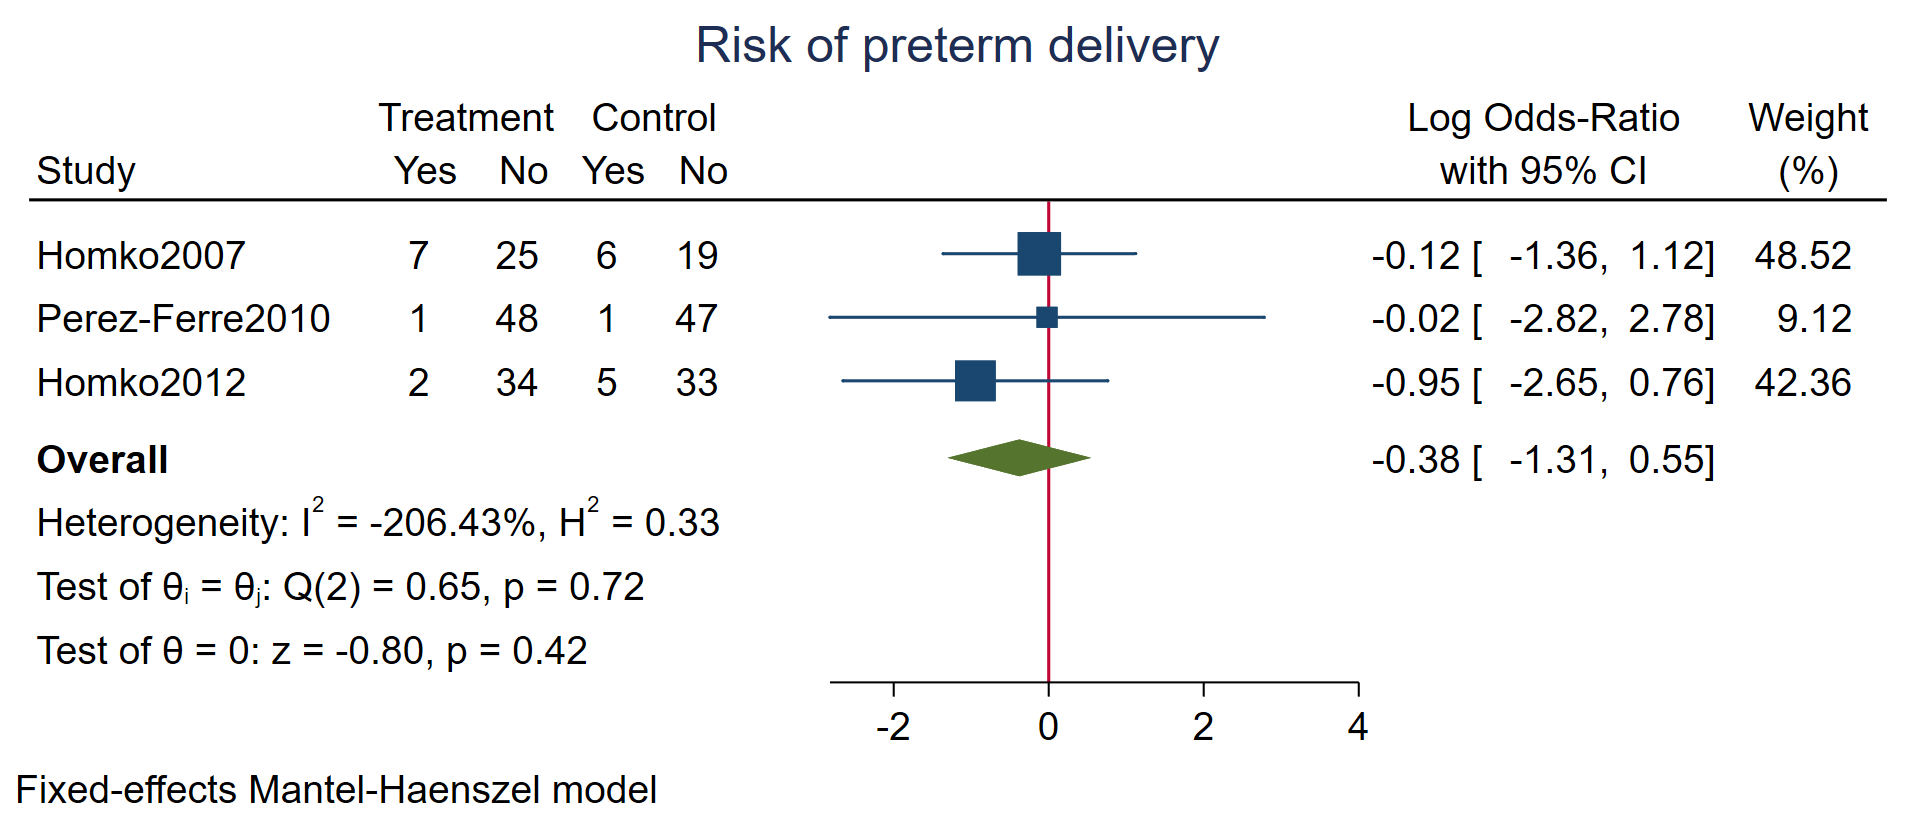


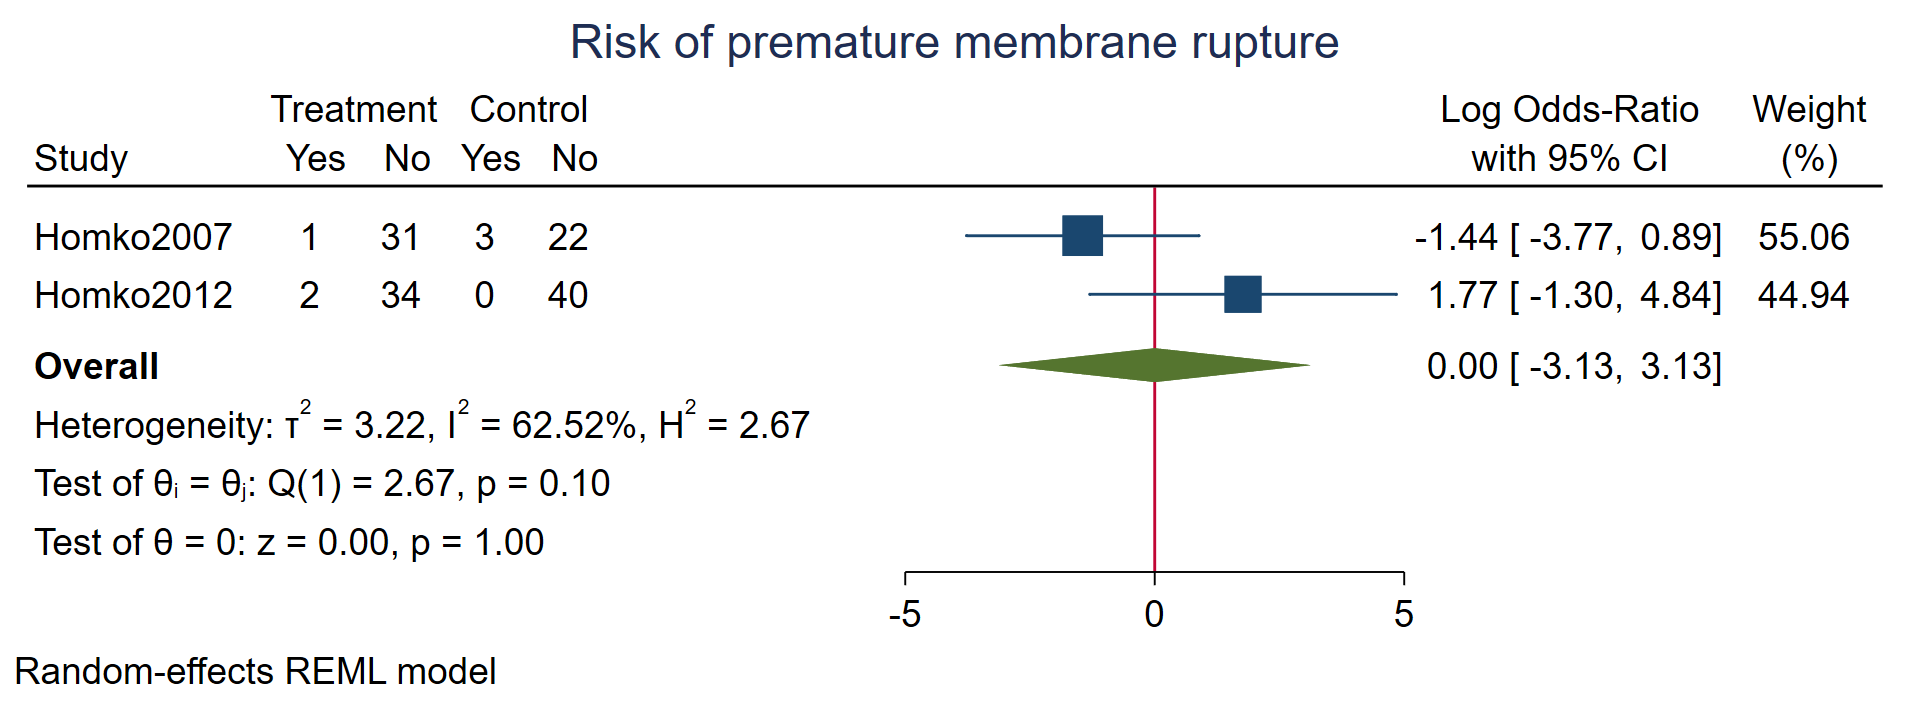


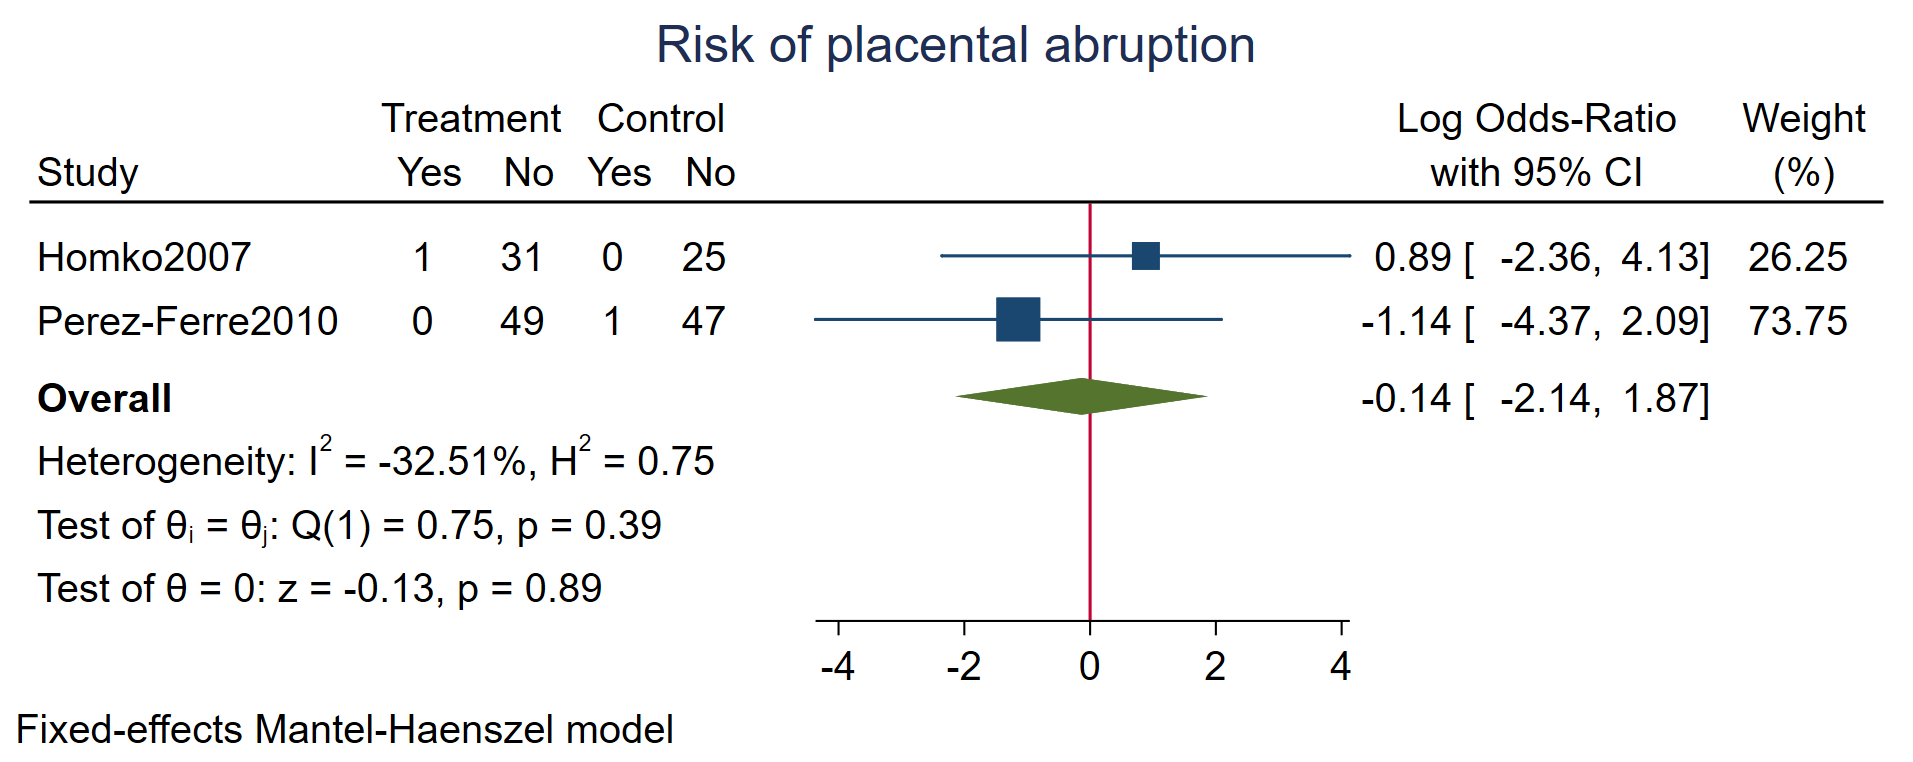


Appendix 7: Meta-analyses of secondary outcomes (neonatal)


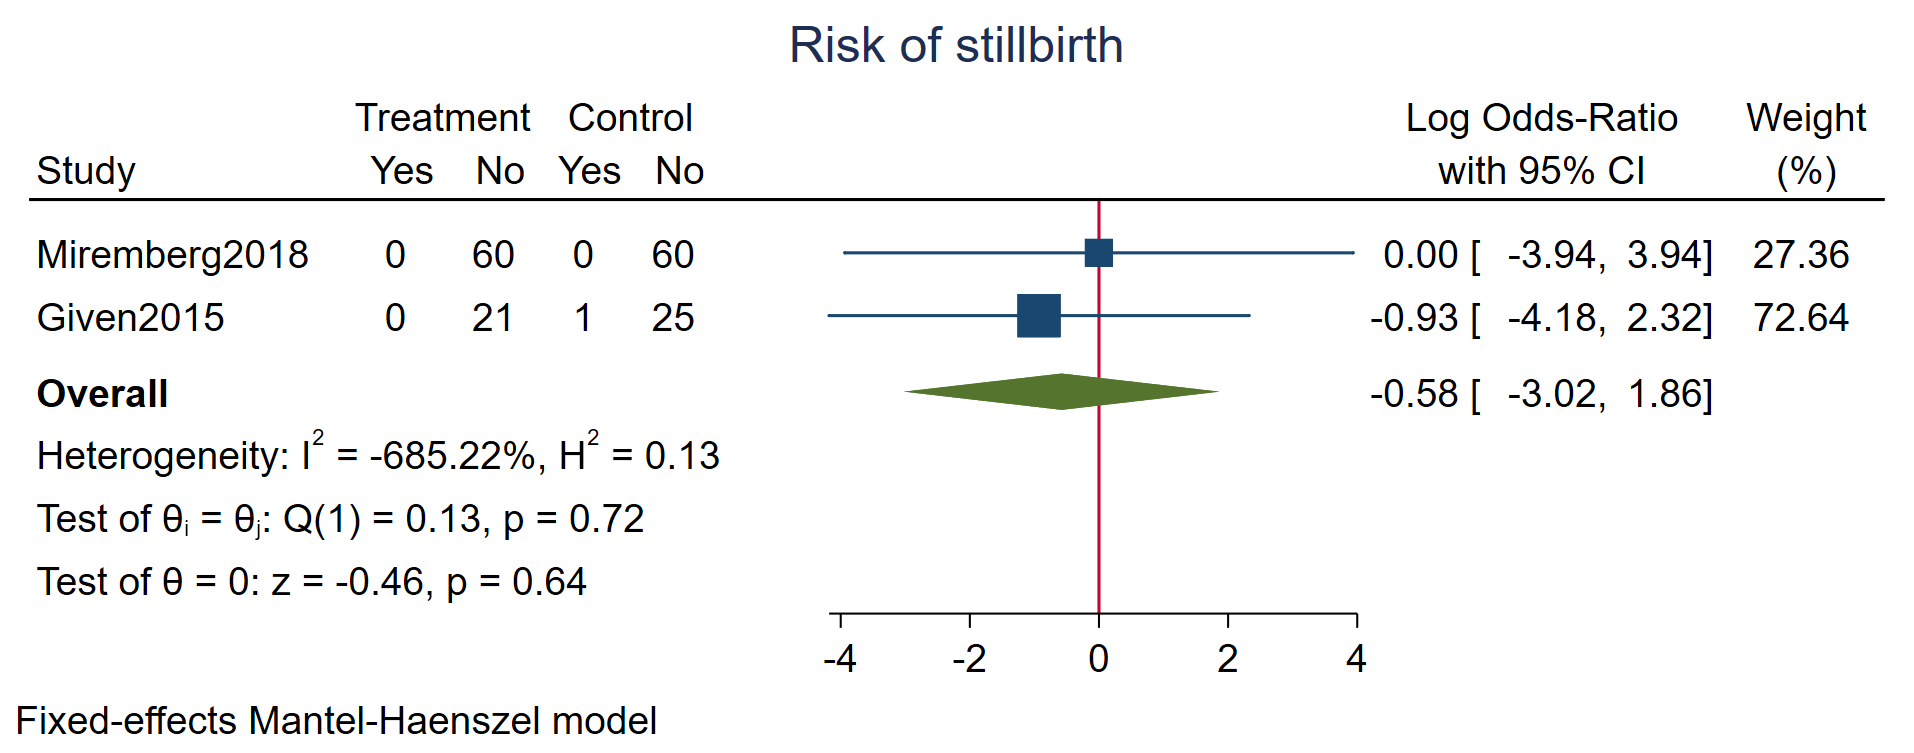

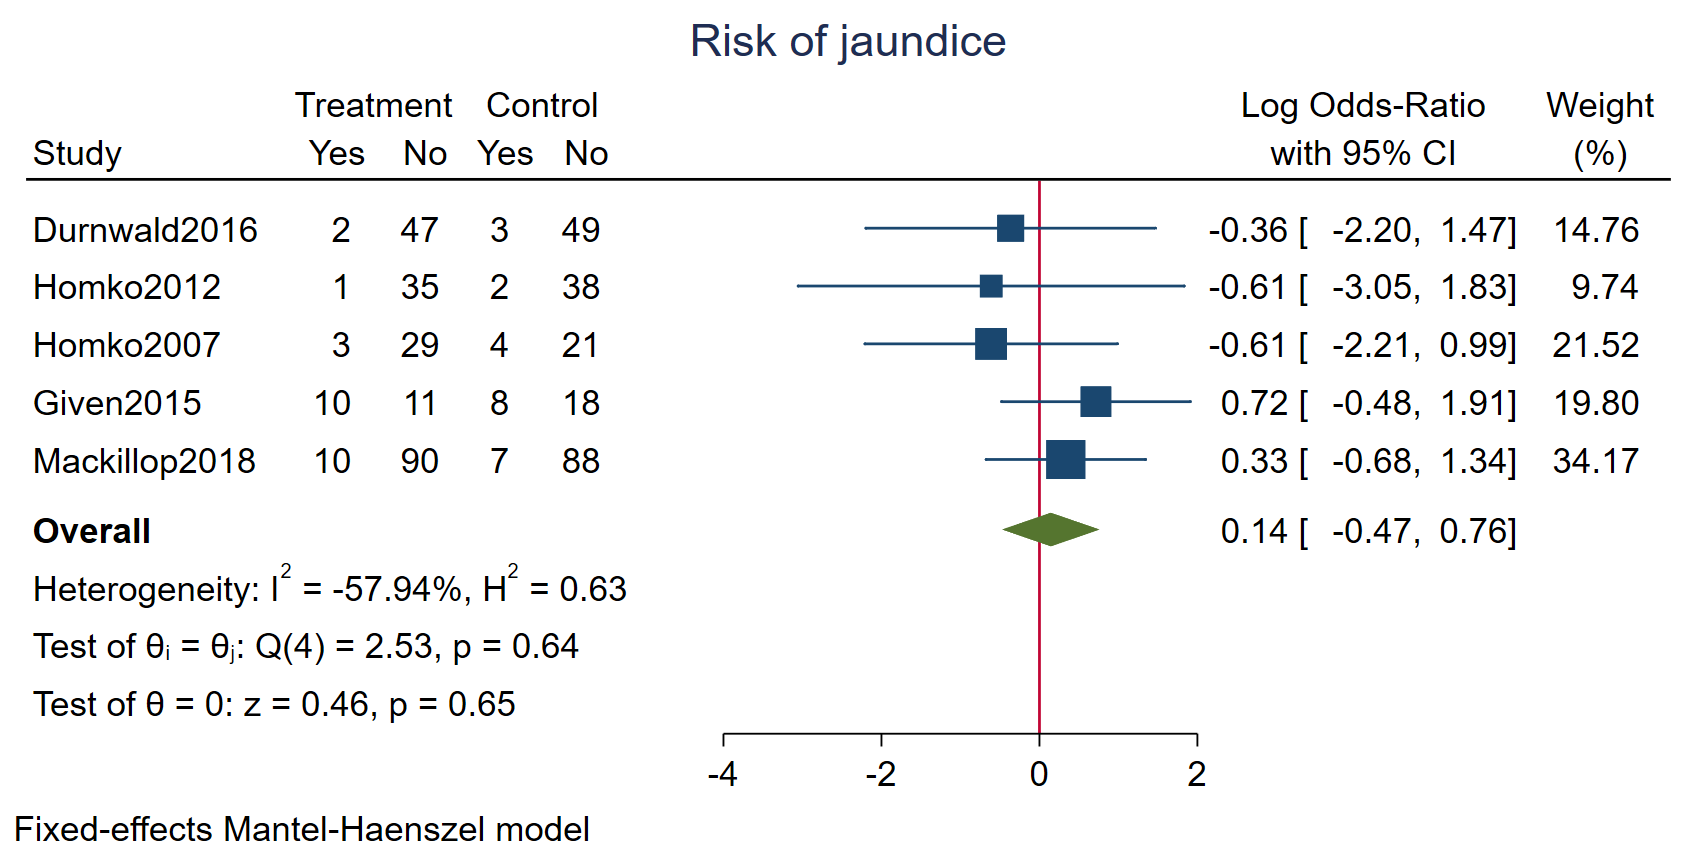

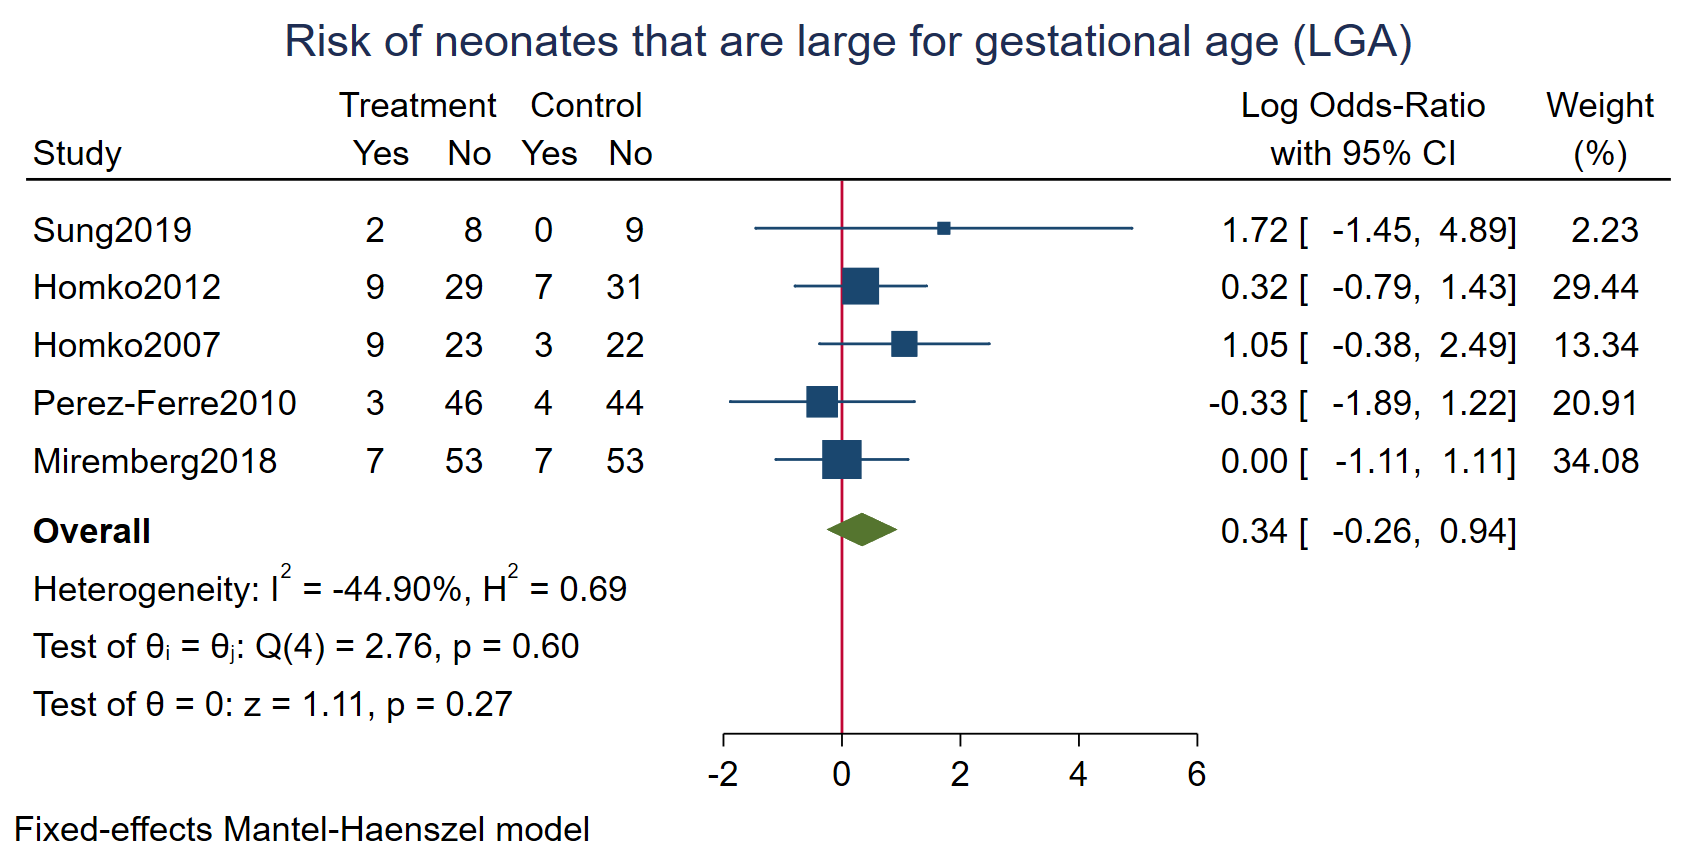

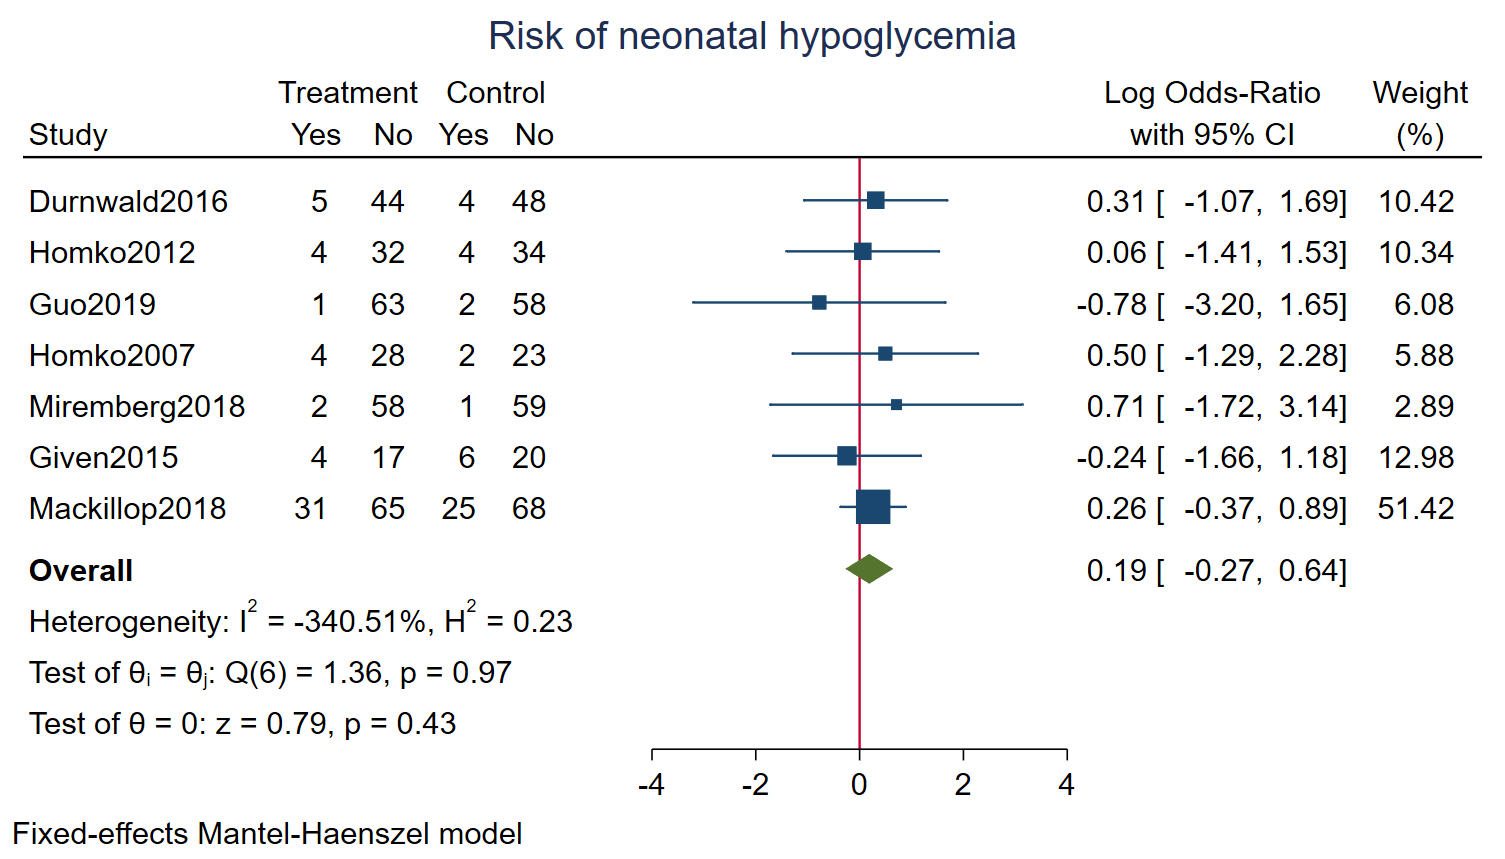

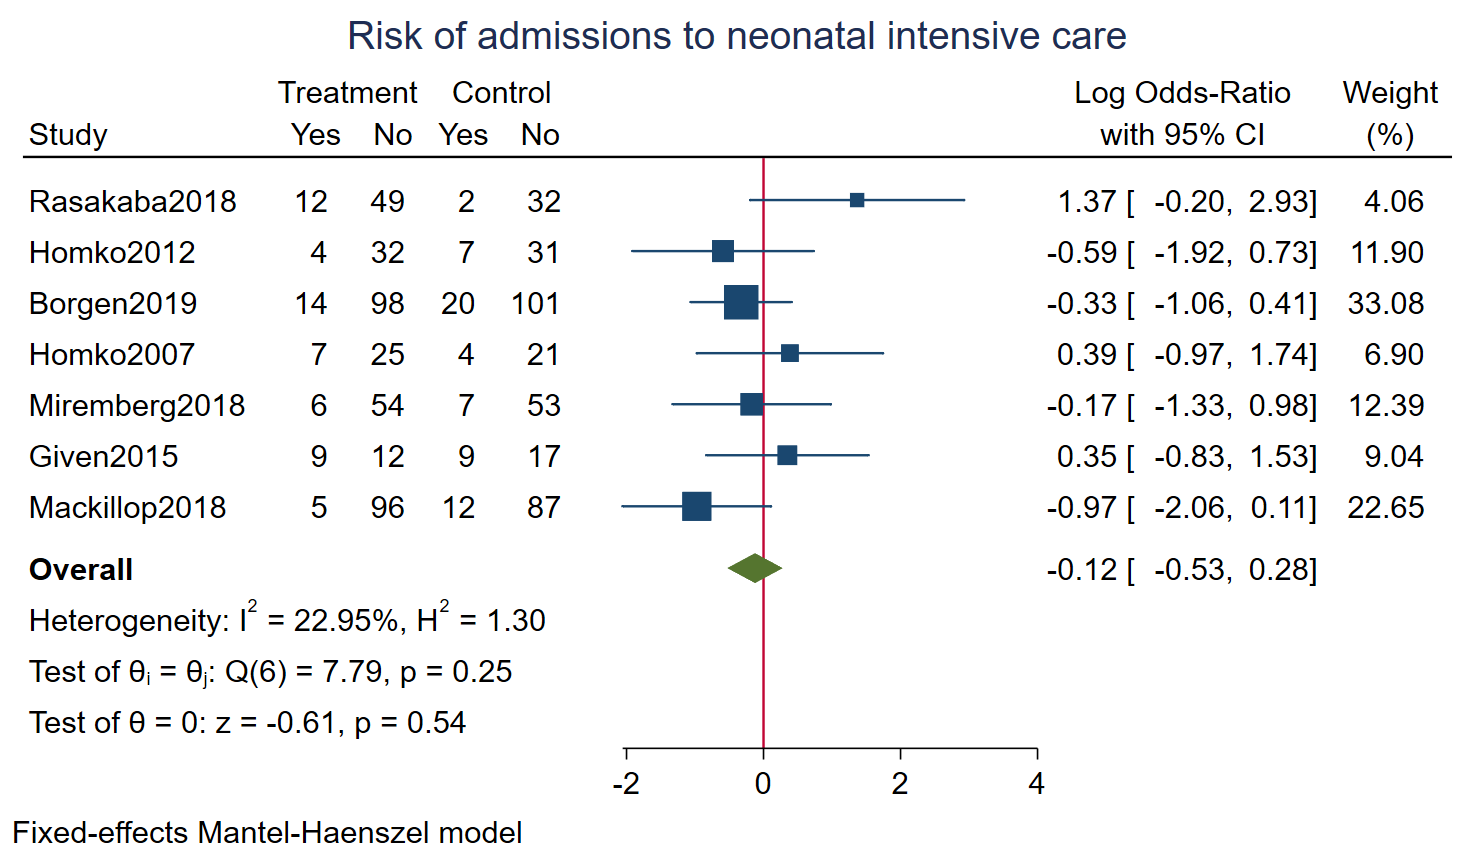

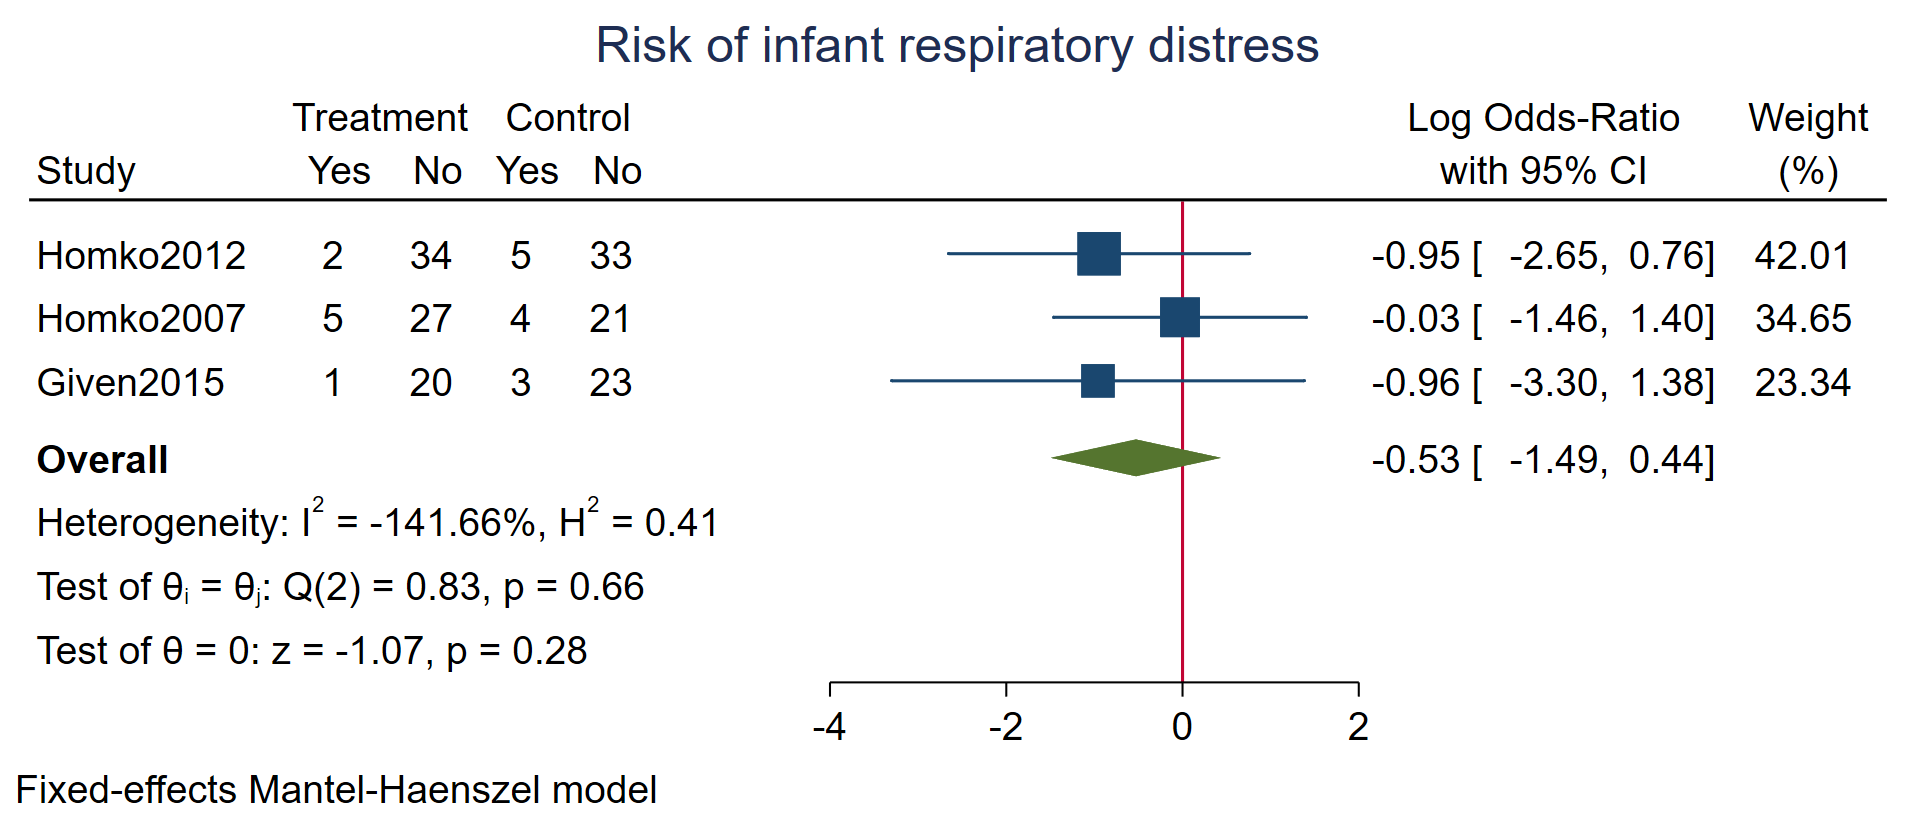

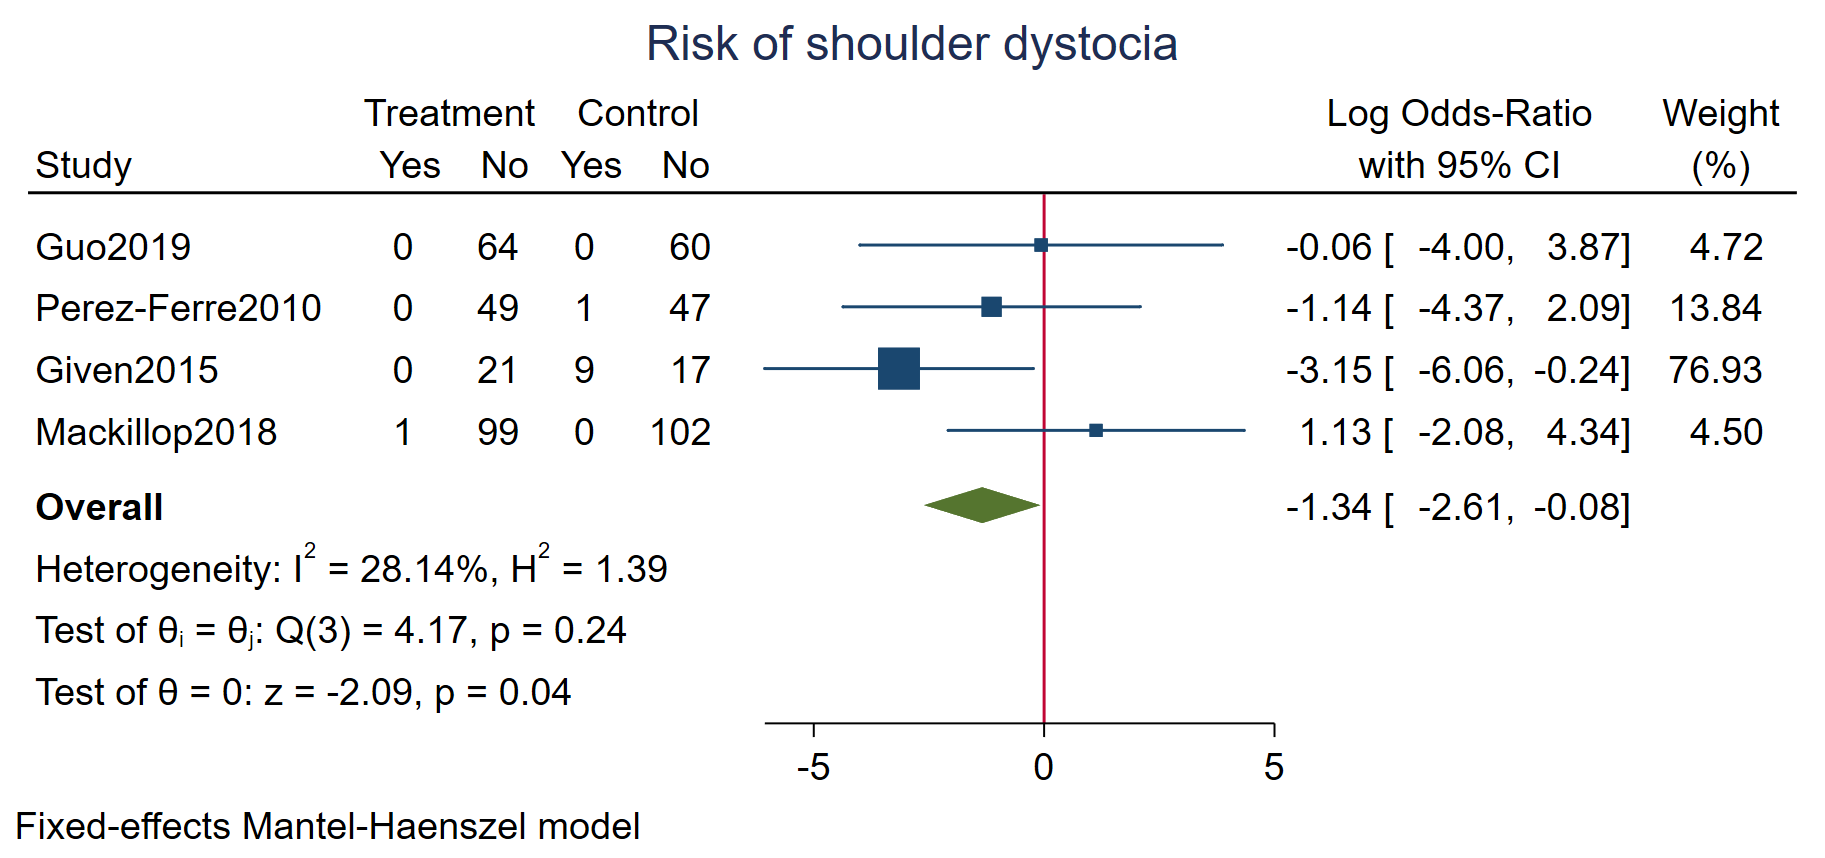

Supplement: Supplementary file 1 [file 35069089]
